1 **Resolving the spatial and cellular architecture of lung adenocarcinoma by multi-**  
2 **region single-cell sequencing**

3

4 Ansam Sinjab <sup>1\*</sup>, Guangchun Han <sup>2\*</sup>, Kieko Hara <sup>1</sup>, Warapen Treekitkarnmongkol <sup>1</sup>,  
5 Patrick Brennan <sup>3</sup>, Minghao Dang <sup>2</sup>, Dapeng Hao <sup>2</sup>, Ruiping Wang <sup>2</sup>, Enyu Dai <sup>2</sup>, Hitoshi  
6 Dejima <sup>1</sup>, Jiexin Zhang <sup>4</sup>, Elena Bogatenkova <sup>3</sup>, Beatriz Sanchez-Espiridion <sup>1</sup>, Kyle  
7 Chang <sup>5</sup>, Danielle R. Little <sup>6</sup>, Samer Bazzi <sup>7</sup>, Linh Tran <sup>8</sup>, Kostyantyn Krysan <sup>8</sup>, Carmen  
8 Behrens <sup>9</sup>, Dzifa Duose <sup>1</sup>, Edwin R. Parra <sup>1</sup>, Maria Gabriela Raso <sup>1</sup>, Luisa M. Solis <sup>1</sup>,  
9 Junya Fukuoka <sup>10</sup>, Jianjun Zhang <sup>9</sup>, Boris Sepesi <sup>10</sup>, Tina Cascone <sup>9</sup>, Lauren Byers <sup>9</sup>,  
10 Don L. Gibbons <sup>9</sup>, Jichao Chen <sup>6</sup>, Seyed Javad Moghaddam <sup>6</sup>, Edwin J. Ostrin <sup>11</sup>, Daniel  
11 G. Rosen <sup>12</sup>, Junya Fujimoto <sup>1</sup>, John V. Heymach <sup>9</sup>, Paul Scheet <sup>1,2,5</sup>, Steven Dubinett <sup>8</sup>,  
12 Ignacio I. Wistuba <sup>1</sup>, Christopher S. Stevenson <sup>13</sup>, Avrum E. Spira <sup>13,14</sup>, Linghua Wang  
13 <sup>2#</sup>, Humam Kadara <sup>1#</sup>

14

15 Departments of Translational Molecular Pathology <sup>1</sup>, Genomic Medicine <sup>2</sup>, Pathology <sup>3</sup>,  
16 Bioinformatics and Computer Biology <sup>4</sup>, Epidemiology <sup>5</sup>, Pulmonary Medicine <sup>6</sup>,  
17 Thoracic, Head and Neck Medical Oncology <sup>9</sup>, Cardiovascular and Thoracic Surgery <sup>10</sup>  
18 and General Internal Medicine <sup>11</sup>, The University of Texas MD Anderson Cancer Center,  
19 Houston, TX, USA. Department of Medicine <sup>7</sup>, University of Balamand, Koura, Lebanon.  
20 Department of Medicine <sup>8</sup>, The University of California Los Angeles, Los Angeles, CA,  
21 USA. Department of Pathology <sup>10</sup>, Nagasaki University Graduate School of Biomedical  
22 Sciences, Nagasaki, Japan. Department of Pathology and Immunology <sup>12</sup>, Baylor  
23 College of Medicine, Houston, TX, USA. Lung Cancer Initiative at Johnson and Johnson  
24 <sup>13</sup>, Boston, MA, USA. Section of Computational Biomedicine <sup>14</sup>, Boston University,  
25 Boston, MA, USA.

26

27 \*: equally contributing co-first authors

28 #: equally contributing senior co-corresponding authors

29

30 **Running title:** Spatial single-cell atlas of lung adenocarcinoma

31

32 **Keywords:** lung adenocarcinoma, single-cell RNA sequencing, tumor heterogeneity,  
33 spatial evolution, tumor microenvironment.

34

35 **Financial support:** Supported in part by research funding from Johnson and Johnson,  
36 National Cancer Institute (NCI) grants R01CA205608, 1U2CCA233238, University of  
37 Texas SPORE in Lung Cancer P50CA070907 and P50 core grant CA016672 (ATGC),  
38 and NIH grant 1S10OD024977, and the start-up research funds provided to L.W. by  
39 U.T. MD Anderson Cancer Center.

40

41 **Correspondence to:** Humam Kadara, Ph.D., Department of Translational Molecular  
42 Pathology, The University of Texas MD Anderson Cancer Center. Phone: +1-713-745-  
43 3186; Email: [hkadara@mdanderson.org](mailto:hkadara@mdanderson.org) or Linghua Wang, M.D., Ph.D., Department of  
44 Genomic Medicine, The University of Texas MD Anderson Cancer Center. Phone: +1-  
45 713-563-2293; Email: [lwang22@mdanderson.org](mailto:lwang22@mdanderson.org).

46

47 **Disclosure of conflict of interest:** CSS and AES are employees of Johnson and  
48 Johnson. HK receives research support from Johnson & Johnson.

49

50 **ABSTRACT**

51 Little is known of the geospatial architecture of individual cell populations in lung  
52 adenocarcinoma (LUAD) evolution. Here, we perform single-cell RNA sequencing of  
53 186,916 cells from five early-stage LUADs and fourteen multi-region normal lung tissues  
54 of defined spatial proximities from the tumors. We show that cellular lineages, states,  
55 and transcriptomic features geospatially evolve across normal regions to the LUADs.  
56 LUADs exhibit pronounced intratumor cell heterogeneity within single sites and  
57 transcriptional lineage-plasticity programs driven by *KRAS* mutations. T regulatory cell  
58 phenotypes are increased in normal tissues with closer proximity to LUAD, in contrast to  
59 diminished signatures and fractions of cytotoxic CD8+ T cells, antigen-presenting  
60 macrophages and inflammatory dendritic cells. Further, the LUAD ecosystem harbors  
61 gain of ligand-receptor based interactions involving increased expression of CD24  
62 antigen on epithelial cells and SIGLEC10 on myeloid subsets. These data provide a  
63 spatial atlas of LUAD evolution, and a resource for identification of targets for treatment.

64 **Statement of significance:** The geospatial ecosystem of the peripheral lung and early-  
65 stage LUAD is not known. Our multi-region single-cell sequencing analyses unravel cell  
66 populations, states, and phenotypes in the spatial and ecological evolution LUAD from  
67 the lung that comprise high-potential targets for early interception.

68

69 **INTRODUCTION**

70

71 Lung adenocarcinoma (LUAD) is the most common histological subtype of lung cancer  
72 and accounts for most cancer deaths (1,2) Over the past decade and following results  
73 from the National Lung Screening Trial, annual low dose CT screening was endorsed in  
74 an effort to reduce lung cancer mortality (3). Since then, an increasing number of early-  
75 stage LUAD diagnoses has warranted the need for novel personalized early-treatment  
76 strategies, which in turn heavily rests on an improved understanding of the molecular  
77 and cellular processes underlying early LUAD development.

78

79 Previous studies have identified molecular alterations in histologically normal-appearing  
80 epithelial *fields* that are close to solid tumors including those of the lung and that are  
81 less prevalent or absent in relatively more distant (from the tumor) regions -- suggesting  
82 geospatial heterogeneity in the uninvolved lung that is pertinent to development of a  
83 nearby tumor (4). While these studies have provided valuable insights into the *spatial*  
84 development of cancer from a particular niche in the lung, they have been mainly  
85 guided by bulk profiling approaches (4,5). It is now appreciated that editing of the  
86 immune microenvironment towards protumor phenotypes including escape of immune  
87 surveillance portends the underlying biology, development, and progression of LUAD  
88 (5). Yet, the interplay between individual immune cell populations (and other cell  
89 subsets) in spatial development of early-stage LUAD is not known. Technologies that  
90 profile tissues at single-cell resolution have permitted delineating the molecular and  
91 cellular complexity of tumor ecosystems. Recent reports have employed single-cell  
92 sequencing technologies to chart the immune microenvironment of advanced lung  
93 cancers as well as to probe mechanisms underlying lung tumor metastasis and  
94 response to targeted therapies (6-9). Yet, the complex spatial evolution of  
95 heterogeneous cellular populations and their interactions, and as an early-stage LUAD  
96 develops from the peripheral lung, has remained largely unresolved.

97

98 Here, we sought to discern the spatial atlas of the peripheral lung and early-stage LUAD  
99 at single-cell resolution to better understand the topological architecture of LUAD

100 evolution. We performed deep scRNA-seq analysis of 19 spatial regions, including  
101 enriched epithelial populations, from five early-stage LUADs and 14 multi-region  
102 normal-appearing lung tissues with differential and defined spatial proximities from the  
103 tumors. Our study unravels tumor evolutionary trajectories as well as geospatial  
104 evolution in cell populations, their expression signatures, and ligand-receptor based  
105 interactions that portray how early-stage LUAD develops from the lung ecosystem.

106

107

## 108 **RESULTS**

109

### 110 **Single-cell spatial landscape of early-stage LUAD**

111 To begin to chart a comprehensive single-cell atlas of early-stage LUAD and the  
112 peripheral lung, we performed scRNA-seq on all cells from a freshly resected early-  
113 stage LUAD (P1) as well as matched tumor-adjacent and relatively more distant normal  
114 lung tissues (**Fig. 1A**). The spatial locations of multi-region normal tissues were  
115 carefully defined with respect to the tumor edge (Supplementary Methods), such that  
116 the studied samples span a spatial continuum and, thus, enable interrogation of  
117 geospatial relationships among early-stage LUAD and the peripheral lung tissues,  
118 hereby defined as LUAD “field”. Unsupervised clustering of 15,132 QC-passed cells  
119 revealed cell clusters representing 5 major cellular lineages, namely epithelial,  
120 endothelial, myeloid, lymphoid, and stromal cell subsets (**Fig. 1B, Supplementary Fig.**  
121 **S1**). Epithelial (*EPCAM*<sup>+</sup>) cell fractions were 3.7%, 5.4%, and 3.5% for tumor, tumor-  
122 adjacent and -distant normal samples, respectively, at an average of 4.2% and in line  
123 with previous studies interrogating different subtypes and/or stages of lung cancer  
124 ((8,10); **Fig. 1B and C**).

125

126 To increase the throughput and to better capture patterns of cellular heterogeneity  
127 based on distance from LUADs, in particular within the epithelial lineage, we performed  
128 separate scRNA-seq analysis on epithelial (*EPCAM*<sup>+</sup>) and non-epithelial (*EPCAM*<sup>-</sup>)  
129 single cells enriched from early-stage LUADs of four additional patients (P2-P5,  
130 Methods), each with three matching normal lung tissues of defined spatial proximities to

131 LUADs: tumor-adjacent, -intermediate and -distant (total of 19 samples and 35 scRNA-  
132 seq libraries from P1-P5; **Fig. 1A**). A total of 186,916 cells were retained for subsequent  
133 analyses with a median of 1,844 genes detected per cell (**Supplementary Fig. S1A-  
134 S1C; Supplementary Table S1**). By single-cell sequencing two separate fractions  
135 (*EPCAM*-positive and *EPCAM*-negative), we were able to profile samples markedly  
136 enriched with epithelial cells (37.6%,  $n = 70,030$  epithelial cells) in comparison to the  
137 unbiased approach (4.2%, non-*EPCAM*-enriched) in P1 (**Fig. 1D**). Cells were uniformly  
138 derived from all spatial samples and their lineage cluster fractions spatially distributed  
139 along the continuum of LUAD-to-distant normal tissues (**Fig. 1E**). We next computed  
140 the Euclidean distance metric and from this inferred hierarchical relationships among  
141 major cell lineages across the spatial fields (**Fig. 1F**, see **Methods**). Overall, cells of the  
142 LUAD tumor samples were transcriptomically distinct from those of the normal samples  
143 across major cell lineages. Of note, we found that cells from adjacent normal samples in  
144 3 out of 5 patients (P2, P4 and P5) were clustered more closely with those of LUAD tumor  
145 samples (i.e. lymphoid and myeloid lineages) than those of intermediate and distant  
146 normal tissues, thereby reflecting possible transcriptomic gradients (**Fig. 1F**).

147  
148 We then further classified lymphoid and myeloid lineages and determined major cell  
149 types, such as T cells, B cells, natural killer (NK) cells, macrophages, or dendritic cells  
150 (DC) based on expression of canonical marker genes (**Fig. 1G; Supplementary Fig.  
151 S1E, Methods**). Analysis of spatial cell composition revealed distinct topological  
152 gradients including greatly increased fractions of B cells and decreased abundance  
153 levels of NK cells with greater proximity to the tumors (**Fig. 1H; Supplementary Table  
154 S2**), which were evident and consistent across patients (**Fig. 1I**). These observations  
155 highlight geospatial transcriptomic heterogeneity in single-cell tumor microenvironment  
156 landscape of early-stage LUADs.

### 157 158 **Spatial diversity and intratumoral heterogeneity of lung epithelial lineage**

159 We next interrogated spatial epithelial features of the LUADs and multi-region normal  
160 tissues. The 70,030 epithelial cells formed 10 distinct clusters representing different  
161 airway lineages including alveolar type I (AT1; C2, *AGER*+), AT2 (C3; *SFTPC*+), basal

162 (C4; *KRT15+*), bronchioalveolar (C5; *SFTPC+/SCGB1A1+*), ciliated (C6; *PIFO+*) and  
163 club/secretory (C7; *BPIFB1+*) cells (**Fig. 2A and B; Supplementary Fig. S2A;**  
164 **Supplementary Table S3**). We also identified, as distinct clusters, the recently-  
165 described and rare ionocytes (C8; *FOXI1+/CFTR+*; (11)), understudied bipotent alveolar  
166 progenitors (C1; (12)), as well as unique cell states such as proliferating basal cells  
167 (C10; *TOP2A+*). In addition, we noted a cluster of malignant-enriched (C9) cells of  
168 mixed lineage (8) mostly from the LUADs (**Fig. 2A-C**). Cells from the five LUADs were  
169 predominantly, yet not exclusively, comprised of C9 cells (**Fig. 2B; Supplementary Fig.**  
170 **S2B; Supplementary Table S4**). Interestingly, few cells from the normal tissues were  
171 found in the C9 cluster (**Fig. 2A-C**). Therefore, to distinguish *bona fide* malignant cells  
172 from non-malignant subsets, we employed a strategy that infers copy number variations  
173 (CNVs) from scRNA-seq data in every epithelial cell (13) (Methods). We found overall  
174 high CNV (inferCNV) scores in cells from C9 (**Fig. 2A**, right), thereby supporting the  
175 overall malignant assignment of this cluster. We also noted pronounced steady-state  
176 enrichment or depletion of epithelial subsets with closer spatial proximity to the tumors  
177 (**Fig. 2C and D**). Relative to cells from tumor-intermediate or -distant normal sites, cells  
178 from tumor-adjacent normal tissues were, overall, more transcriptomically similar  
179 (clustered closely) to those from the LUADs (**Fig. 2E**), signifying spatial epithelial  
180 patterns that are possibly tumor-pertinent.

181

182 Alveolar differentiation hierarchies have been shown to partake in lung tumor  
183 development *in vivo* (12,14,15). In our cohort, alveolar cells with definitive lineage  
184 features (e.g. AT1, AT2, and alveolar progenitors) were marked depleted in LUAD  
185 tissues (**Fig. 2C and D**), which prompted us to dissect potential alveolar differentiation  
186 trajectories. Pseudotemporal ordering of alveolar cells revealed a developmental  
187 hierarchy that was initiated by AT2 cells and that followed a main trajectory of  
188 differentiation into AT1 cells (**Supplementary Fig. S2C and S2D**) in close agreement  
189 with previous studies in mice (12,14,15). The differentiation trajectory included  
190 increased NOTCH signaling score (**Supplementary Fig. S2E and S2F**) in line with  
191 previously reported role of NOTCH in AT2-to-AT1 differentiation and alveolar repair  
192 (16).

193

194 To further investigate malignant programs, we performed subclustering of malignant-  
195 enriched C9 cells ( $n = 10,667$  cells) while projecting inferCNV scores, which separated  
196 likely malignant cells from subsets of normal tissues such as those evident in P2 (**Fig.**  
197 **2F; Supplementary Fig. S2G; Supplementary Table S5**). We noted overall low  
198 inferCNV scores in malignant-enriched cells derived from the LUAD of P2 (**Fig. 2F**).  
199 Interestingly, among all P2 epithelial subsets, 29% of malignant-enriched cells (160 of  
200 547) harbored the *KRAS* G12D mutation (**Fig. 2F and G; Supplementary Fig. S2H**).  
201 These cells exhibited distinctively high expression of *MUC5AC* (**Fig. 2G**) and tumor  
202 markers (e.g., *CEACAM5*, **Supplementary Fig. S2I; Supplementary Table S6**). They  
203 also displayed elevated levels of *LCN2* and reduced expression of *NKX2-1* when  
204 compared to *KRAS* wild type cells from the same LUAD (**Supplementary Fig. S2I;**  
205 **Supplementary Table S6**), suggestive of mucinous differentiation (17,18) and in line  
206 with the histological (mucinous) pattern of this tumor (**Supplementary Table S1**). These  
207 findings underscore spatial heterogeneity dynamics comprising driver mutation, lineage  
208 plasticity, and stable chromosomal alterations that are unique to the cellular ecosystem  
209 of *KRAS*-mutant LUAD.

210

211 Unlike P2, C9 cells in P3 and P5 were almost exclusively derived from the LUAD  
212 tissues (**Fig. 2F**). In P3 LUAD, we identified large-scale chromosomal alterations  
213 (**Supplementary Fig. S2G; Supplementary Table S5**), based on which unsupervised  
214 clustering analysis revealed 4 clusters with differential CNV profiles. Among them, three  
215 clusters (C2, C3, and C4) exhibited pronounced CNVs that were indicative of malignant  
216 cell features (**Fig. 2H, left**). Notably, we found an additional CNV event (i.e. gain of 1p)  
217 unique to cells of cluster C4 but not C2 or C3, possibly signifying a late event in the  
218 evolutionary trajectory of P3 LUAD. When inferCNV clusters were projected on the  
219 pseudotime trajectory plot, we observed a branched differentiation trajectory that mainly  
220 started with cells of C2 and C3 and comprised few “normal cells” with club and  
221 secretory lineage, and that later branched into cells of inferCNV cluster C4 (**Fig. 2I, top**)  
222 -- suggesting that P3 LUAD perhaps originated from club/secretory cells and that indeed  
223 C4 evolved from C2 and C3. P5 LUAD comprised 6 distinct inferCNV clusters that are



224 indicative of high degree of genotypic heterogeneity within the same tumor region (**Fig.**  
225 **2H**, right). Among these clusters, cells of C1 had more intensive CNVs, while cells of C4  
226 clustered the closest to those of C3 which comprised mostly non-malignant cells (**Fig.**  
227 **2H**, right). Pseudotime trajectory analysis revealed a C4-to-C1 evolutionary path, which  
228 in contrast to P3 was unidirectional and unbranched, suggesting that C4 and C1 in P5  
229 signified malignant cells from early and late developmental states, respectively (**Fig. 2I**,  
230 bottom). Together, our single-cell interrogation of a large number of epithelial cells from  
231 multi-region tissues identified diverse epithelial identities, developmental malignant  
232 trajectories, as well as high resolution intratumor cell heterogeneity.

233

### 234 **Lymphoid reprogramming towards a protumor microenvironment**

235 We further characterized lymphoid spatial dynamics (**Fig. 1H and I**), including unique  
236 cellular states across all lymphoid clusters ( $n = 53,882$  cells) in the LUAD field samples  
237 (see Methods; **Supplementary Fig. S3A**). This clustering analysis unveiled 10  
238 transcriptomically distinct lymphoid cell types/states (**Fig. 3A and 3B, Supplementary**  
239 **Table S7**) that were, overall, spatially modulated by tumor proximity (**Fig. 3C;**  
240 **Supplementary Fig. S3B**). Relative to normal tissues, LUADs were heavily enriched  
241 with plasma cells ( $SDC1+/MZB1+$ ), B cells ( $CD19+/CD22+$ ), and regulatory T cells  
242 (Treg;  $FOXP3+$ ) (**Fig. 3A-C**). With increasing tumor proximity, we noted a gradual  
243 decrease in NK cells ( $GNLY+$ ), innate lymphoid cells (ILCs), both  $GZMA$ -hi and  $GNLY$ -  
244 hi  $CD4+$  cytotoxic T lymphocytes (CTL;  $CD40LG+$ ,  $BATF+$ ), and  $GNLY$ -hi  $CD8+$  CTLs,  
245 all of which were, overall, depleted in the LUADs (**Fig. 3A-C**).

246

247 We further performed subclustering analysis of  $CD8+$  T cells, which revealed 3  
248 subpopulations, naïve  $CD8+$  T cells,  $GZMK$ -hi  $CD8+$  CTLs, and  $GNLY$ -hi  $CD8+$  CTLs,  
249 with differential expression of cell state signatures (**Fig. 3D; Supplementary Tables S8**  
250 **and S10**). We also computed the naïve and cytotoxic T cell scores using curated gene  
251 signatures of naïve and cytotoxic T cells (see Methods), respectively. Consistently, the  
252 naïve  $CD8+$  T cells showed high naïve T cell scores but low cytotoxic T cell scores and  
253 were composed of cells across all samples in the LUAD fields. In contrast, the  $GNLY$ -hi  
254  $CD8+$  CTLs exhibited high expression levels of cytotoxicity genes ( $TBX21$ ,  $KLF3$ ,

255 *FCGR3A*, *KLRG1*, *KLRB1*) and high cytotoxic activity but were specifically depleted in  
256 LUAD samples of all patients (**Fig. 3C-E**). In line with this, we also observed a  
257 significant spatial pattern of reduced cytotoxic activity in P3 and P4 (**Supplementary**  
258 **Fig. S3D**). Overall, CD8+ CTLs showed significant and spatially-modulated reduction in  
259 cytotoxic signature score (depleted in tumors of all patients) and decreased expression  
260 of major cytotoxicity genes, including reduced *NKG7* and *GNLY* expression levels (**Fig.**  
261 **3E**).

262  
263 Spatial analysis of CD4+ T cell states (**Supplementary Tables S9 and S10**) showed  
264 that LUAD tissues were specifically enriched with *FOXP3*+ Tregs (**Fig. 3F and 3G**;  
265 **Supplementary Table S11**) and the Treg signature scores were significantly and  
266 spatially increased with closer proximity to all LUADs (**Supplementary Fig. S3E**). The  
267 Tregs cells also expressed high levels of pro-tumor immune checkpoints including  
268 *TIGIT*, *CTLA4*, *LAG3*, or *PDCD1* (**Fig. 3G**). Of note, the fraction of Tregs co-expressing  
269 both *CTLA-4* and *TIGIT* immune checkpoints was progressively higher along the  
270 spectrum of distant normal sites to more adjacent (to the tumor) regions up to the  
271 LUADs (**Fig. 3G**, bottom). In contrast, we noted a significant reduction of cytotoxic  
272 CD4+ CTLs characterized by high expression of *GZMA*, *GNLY*, or both *GZMA* and  
273 *GZMH*, with increasing proximity to all LUADs (**Supplementary Fig. S3F-H**).

274  
275 We further examined the spatial enrichment of LUADs with plasma cells and B cells  
276 (**Fig. 3A-C; Supplementary Table S11**). Expression profiling of plasma cells revealed  
277 spatial changes in isotype-switching, such as increased *IGHA1/2* and decreased  
278 *IGHG1/3* with increasing proximity to P3 and P5 LUADs (**Supplementary Fig. S3I-K**;  
279 **Supplementary Table S12**). Based on differential gene expression profiles, we  
280 identified 3 distinct subsets of B cell states (**Supplementary Table S13**), including a  
281 LUAD-enriched subcluster (C0) with high expression levels of *RAC2*+ and *ACTG*+  
282 (**Supplementary Fig. S3L-N**), that are known to play key roles in synapse formation in  
283 B cells (19). Importantly, when analyzed in an external cohort of matched normal lung,  
284 preneoplasia and LUAD (20), the B cell signature (C0) was progressively increased  
285 across atypical adenomatous hyperplasias (AAH), the preneoplastic precursors of

286 LUAD, and invasive LUAD lesions compared to matched normal lung tissues  
287 **(Supplementary Fig. S30)**. Taken together, these analyses propose spatial properties  
288 in lymphoid cell states that underlie pro-tumor immune remodeling in early-stage LUAD.

289  
290 **Depletion of antigen presenting macrophages and inflammatory dendritic cells**  
291 Spatial LUAD field patterns in myeloid cells **(Fig. 1H and 1I)** prompted us to further  
292 investigate myeloid subsets and cellular states in the early-stage LUADs and their  
293 normal multi-region tissues **(Supplementary Fig. S4A)**. In total, 45,803 myeloid cells  
294 were clustered into 13 distinct subsets: classical monocytes (*S100A8+*, *S100A9+*), non-  
295 classical monocytes (*CDKN1C+*), mast cells (*MS4A2+*), neutrophils (*IL1A+*), M2-like  
296 macrophages C1 (*TREM2+*), M2-like macrophages C5 (*CD163+*), alveolar  
297 macrophages (*MARCO+*), classical dendritic cells 1 (cDC1; *CLEC9A+*), cDC2  
298 (*CLEC10A+*), plasmacytoid DC (pDC; *PLD4+*), other DCs (*CCL22+*) and proliferating  
299 myeloid cells (*TOP2A+*) **(Fig. 4A and 4B; Supplementary Tables S14 and S15)**.  
300 Mapped to the field samples, M2-like macrophages C5, monocytes (classical and non-  
301 classical), and mast cells were gradually depleted with increasing tumor proximity,  
302 whereas M2-like macrophages C1, proliferating myeloid subsets and cDC2 cells were  
303 steadily enriched in the tumors **(Fig. 4A and 4C; Supplementary Fig. S4B and S4C)**.

304  
305 We next performed subclustering analysis of monocytes and macrophages ( $n = 27,664$   
306 cells) which revealed five distinct subclusters, and confirmed the unique enrichment of  
307 M2-like macrophages C1 in the LUAD tissues **(Fig. 4D; Supplementary Tables S14)**.  
308 Further, we characterized monocyte and macrophage subsets by antigen presentation  
309 capability (i.e. antigen presentation signature score), and found that the M2-like  
310 macrophages C1 showed diminished antigen presentation scores compared to cells of  
311 M2-like macrophages C5 which were mainly enriched in normal samples **(Fig. 4D;**  
312 **Supplementary Table S16)**. In addition, we interrogated the spatial expression of  
313 antigen presentation-related genes in this cluster. We found markedly reduced  
314 expression levels of antigen presentation signature genes, including MHC class I and  
315 MHC class II members with increasing spatial proximity to the LUADs **(Fig. 4E and 4F)**.  
316 Furthermore, the spatially-driven pattern of macrophage antigen presentation depletion

317 was evident across M2-like macrophages combined from both clusters C1 and C5 and  
318 was statistically significant in 4 of the 5 LUAD patient fields (**Fig. 4G**).

319

320 To characterize spatial DC dynamics in early-stage LUAD with respect to cellular states,  
321 we first examined gene and signature score differences between different subsets of  
322 DCs (n = 8,694). Spatial field patterns were evident in cDC2 and pDC subsets (**Fig. 4H**).

323 We observed differential expression of an inflammatory gene signature between the  
324 three cDC2 subclusters with C1, cells of which exhibited the lowest inflammatory  
325 scores, heavily enriched in the LUADs (**Fig. 4I and 4J**). In addition, unsupervised  
326 subclustering analysis of cDC2 cells using a different approach (SC3, see Methods)  
327 identified three distinct cDC2 subclusters, characterized by differential expression of the  
328 chronic inflammatory gene signature (highly enriched in C2) and MHC class II genes  
329 (enriched in C0/1) (**Supplementary Fig. S4D; Supplementary Table S17**) that were  
330 previously shown to discriminate inflammatory from non-inflammatory cDCs (21).

331 Reduced expression of pro-inflammatory genes and increased expression of anti-  
332 inflammatory genes was evident in all cDC2 cells along the continuum of normal-to-  
333 LUAD space (**Fig. 4K**). cDC2 subcluster with the highest inflammatory score (C2) was  
334 markedly under-represented in the LUADs and was further characterized by a spatially  
335 diluted inflammatory signature score with increasing tumor proximity (**Fig. 4L and 4M**).

336 Notably, the inflammatory signature score significantly and progressively decreased  
337 along the continuum from normal lung tissues, to matched premalignant AAHs and  
338 invasive LUADs (**Fig. 4N**) in sharp contrast to non-inflammatory DC expression  
339 components (**Supplementary Fig. S4E**). We also studied pDC subsets and found  
340 spatial enrichment of *FOS*, *FOSB*, and *JUN* with increasing proximity to the tumors  
341 (**Supplementary Fig. S4F and S4G**). Altogether, these data describe spatial immune  
342 remodeling dynamics comprising gradual loss of antigen presentation in macrophage  
343 subclusters and of inflammatory phenotypes in subsets of DCs in early-LUAD  
344 microenvironment.

345

346 We also identified multiple stromal populations in our dataset (**Supplementary Fig.**  
347 **S5A-S5C**), including tumor enrichment of vascular and airway smooth muscle cells,

348 adventitial fibroblasts C5, and endothelial cell (EC) venule clusters (**Supplementary**  
349 **Fig. S5D and S5E**). We pinpointed significantly differentially expressed gene sets in the  
350 EC venule subpopulation and altered stromal signatures (**Supplementary Fig. S5F**)  
351 that support the observed immune-related changes in the LUAD field, and that are in  
352 line with previous observations in a cohort of lung cancers of multiple subtypes (10).  
353 These comprised tumor-specific activation of extracellular matrix reorganization,  
354 syndecan-2 pathway, and neutrophil degranulation, as well as decreased JAK-STAT  
355 signaling and reduced antigen-processing cross-presentation (**Supplementary Fig.**  
356 **S5G and S5H**).

357

### 358 **Ligand-receptor based cell-cell communication networks**

359 Crosstalk between tumor cells and elements in the tumor microenvironment, such as  
360 immune cells, has been implicated in the progression of solid tumors largely in part by  
361 mediating immune-evasive and pro-tumor phenotypes (22). To profile cell-cell  
362 communication networks in early-stage LUAD space, we utilized iTALK (23) to leverage  
363 signals from our scRNA-seq dataset and visualize ligand-receptor (L-R)-mediated  
364 intercellular cross-talk that is spatially modulated within the tumor microenvironment  
365 (**Fig. 5A; Supplementary Table S18**). Computational analysis and annotation were  
366 carried out using the iTALK's built-in database focusing on immune checkpoint-receptor  
367 pairs (n = 55) and cytokine-receptor pairs (n = 327) (**Fig. 5A**). Overall, we found  
368 reduced overlap of L-R interactions between the tumor and distance normal tissues  
369 than that between the tumor and more proximal (adjacent, intermediate) regions (**Fig.**  
370 **5B**).

371

372 By comparative analysis, we identified altered cellular interactions that were significantly  
373 and differentially increased or decreased in LUADs *versus* their respective spatial  
374 normal tissues (**Fig. 5C; Supplementary Fig. S6A**). Specifically, we noted increased  
375 interactions between immune checkpoint proteins *CD24* or *LGALS9* (*Galectin-9*) on  
376 tumor epithelial cells, and *SIGLEC10* on macrophages or *HAVCR2* (*TIM-3*) on DCs,  
377 respectively, and which were shared across multiple patients (**Fig. 5C and 5D;**  
378 **Supplementary Fig. S6A and S6B; Supplementary Table S19**). These interactions

379 were differentially enriched in tumors *versus* normal tissues at different distances from  
380 the tumor (**Fig. 5C; Supplementary Fig. S6A**). Expression levels of the checkpoints  
381 *CD24* and *LGALS9* (*Galectin-9*) were increased in epithelial cells from LUAD tissues in  
382 general, and in malignant epithelial cells in particular, and accompanied by increased  
383 expression of their cognate predicted ligands *SIGLEC10* and *HAVCR2* (*TIM-3*),  
384 respectively, on myeloid cells and with increasing tumor proximity (**Fig. 5D;**  
385 **Supplementary Fig. S6B**). These interactions suggest a spatial pattern of modulation  
386 in cell-cell communication that is mediated by epithelial inhibitory checkpoint signaling to  
387 myeloid cells. Targeted analysis of *CD24* expression in an external cohort using the  
388 Nanostring platform revealed progressively and markedly increased expression of the  
389 antigen across normal lung tissues, AAHs, and LUADs (**Fig. 5F**). *CD24* positively  
390 correlated with expression of the epithelial marker *EPCAM* as well as with levels of pro-  
391 tumor and immune suppressive features (*TIGIT*, *CTLA4*, *FOXP3*, *CCL19*), in contrast to  
392 negatively correlating with anti-tumor immune markers (*GZMB*, *GZMH*, *PRF1*) (**Fig. 5F;**  
393 **Supplementary Fig. S6G**). These pro-tumor and epithelial patterns of *CD24* were  
394 further validated in LUADs (n = 51) from The Cancer Genome Atlas (TCGA) cohort (24)  
395 compared to matched adjacent normal lung tissues (**Fig. 5G and 5H; Supplementary**  
396 **Fig. S6H**), thereby suggesting a potential role for epithelial *CD24* signaling in pro-tumor  
397 immune reprogramming in LUAD evolution.

398  
399 We also identified cytokine-receptor pairs that were differentially modulated in the LUAD  
400 space, such as communication between tumor epithelial cells with high expression of  
401 the cytokine *CX3CL1*, and DCs or macrophages expressing increased levels of its  
402 cognate receptor *CX3CR1* (**Supplementary Fig. S6C, S6D, S6E, S6F;**  
403 **Supplementary Table S18**). *CX3CR1* was increasingly expressed on macrophages  
404 and DCs but decreased on CD8 T cells of tumor samples (**Fig. 5F**), in line with previous  
405 reports implicating macrophage *CX3CR1* with pro-tumor features (25). These findings  
406 signify a potential spatial enrichment of pro-tumorigenic and tumor-mediated cytokine  
407 signaling to macrophages infiltrating the LUAD space.

408

409

## 410 **DISCUSSION**

411

412 Previously, spatial molecular changes have been documented in the local niche of  
413 LUAD including loss-of-heterozygosity in 3p and 9p, point mutations and tumor  
414 suppressor methylation (26,27). Earlier work also underscored transcriptome profiles,  
415 somatic driver variants, as well as genome-wide allelic imbalance that are shared  
416 between lung cancer and adjacent normal-appearing airway cells but that are absent in  
417 distant normal cells, thereby pointing to putative drivers of lung oncogenesis (4,5). As  
418 such, the interrogation of spatial dynamics in LUADs has been a topic of interest,  
419 particularly owing to its utility as a surrogate for studying difficult-to-obtain longitudinal  
420 patient (including precursor) samples. However, much of these studies have focused on  
421 understanding, by bulk profiling methods, spatiotemporal profiles in an aggregate of  
422 cells, thereby inadvertently obscuring the individual contributions of epithelial and tumor  
423 microenvironmental cues to the pathogenesis of lung cancer. Our knowledge of the  
424 spatial architecture of individual cell populations in the evolution of this malignancy  
425 remains poorly understood. By single-cell interrogation of multi-region samples, we here  
426 characterized spatial and ecological maps comprising many epithelial and non-epithelial  
427 subsets and underlying emergence of early-stage LUAD from its local niche.

428

429 Multi-region or spatial analyses have been employed to interrogate intratumor  
430 heterogeneity (ITH) in solid tumors including LUADs, in order to understand  
431 evolutionary trajectories and therapy response (28). Cohorts based on multi-region  
432 sampling and microdissection strategies have increased the resolution for detecting  
433 subtle, rare and subclonal events by bulk sequencing approaches. Our analyses here  
434 showed that ITH is evident at the tumor epithelial cell and intra-site level, i.e. within the  
435 same tumor region or tissue. We applied an integrative approach to dissect ITH of  
436 malignant cells and characterized cell clusters with differential transcriptomic profiles,  
437 evolution trajectories, CNV burdens, and/or driver mutations. We also found “normal”  
438 cells in the LUAD tissues themselves that are close in the inferred trajectory paths to  
439 specific malignant cell subsets (e.g. club/secretory cells for the mucinous LUAD in P2)  
440 and perhaps represent the cells-of-origin for tumor cells. It is noteworthy that we found

441 in the normal-appearing samples cells with features of malignant-enriched subsets and  
442 demonstrating heterogeneous CNV profiles. Whether these cells comprise early LUAD  
443 precursors, mutagenic clones that do not progress to malignancy (e.g. negatively  
444 selected by the immune microenvironment), or putative molecular field cancerization  
445 remains to be investigated. It is important to mention that LUAD exhibits remarkable  
446 inter-patient heterogeneity in histological differentiation patterns, driver alterations and  
447 suggested tumor cells-of-origin (29). We could not characterize the full spectrum in the  
448 heterogeneity of these features (e.g., programs in tumor cells-of-origin of different  
449 lineages) given the limited number of patients profiled. Nonetheless, our in-depth  
450 analysis of a relatively large number of epithelial cells unveiled different characteristics  
451 (airway lineage trajectories, malignant cell programs, potential tumor cells-of-origin, and  
452 cellular ITH) of the epithelial architecture of early-stage LUAD development that could  
453 be extended in the future to a larger and more diverse array of LUADs.

454  
455 We pinpointed G12D mutations in *KRAS*, the most frequently mutated oncogene in  
456 LUAD, to a unique subset of malignant cells within P2 tumor. These cells had overall  
457 low copy number alterations, perhaps reminiscent of findings in LUADs driven by strong  
458 driver genes *in vivo* (30). These cells comprised increased expression of genes  
459 associated with *KRAS*-mutant cancer such as *LCN2* which is a marker of inflammation  
460 (17,31) and elevated levels of genes associated with hyper-mutation such as *CDA* (32).  
461 *KRAS*-mutant cells, compared to other malignant-enriched cells from P2, exhibited  
462 reduced expression of the lineage-specific oncogene *NKX2-1* (33). Earlier studies  
463 demonstrated that increased *LCN2* and reduced *NKX2-1* is observed in mucinous  
464 *KRAS*-mutant LUADs or those undergoing gastric differentiation (17,18), which is in line  
465 with the histological variant of P2 LUAD. It is noteworthy that *NKX2-1* exhibits context-  
466 dependent roles in LUAD development. While *Nkx2-1* was shown to enhance *Egfr*-  
467 driven lung tumorigenesis (34), Winslow et al demonstrated that the transcription factor  
468 suppresses *Kras*-mutant LUAD by controlling tumor differentiation as well as limiting  
469 progression and metastatic potential (35). This is in line with our finding of reduced  
470 expression of airway lineage-specific genes (e.g. *SCGB3A1*, *SFTPB*) suggestive of loss  
471 of differentiation in the *KRAS*-mutant cells compared to other malignant-enriched cell



472 subclusters from the same LUAD tissue. Our observations are also in accordance with  
473 the acquisition of a mixed-lineage phenotype by malignant lung epithelial cells recently  
474 reported by Laughney and colleagues (8). Our findings also allude to the possibility that  
475 tumor cell lineage plasticity may occur at the early stage of *KRAS*-mutant LUAD  
476 carcinogenesis – a supposition that can be better explored with sequencing of a larger  
477 and more diverse repertoire of *KRAS*-mutant cells.

478  
479 Earlier studies have shown that immunosuppressive T regulatory cells are crucial for  
480 immune evasion in lung cancer (36,37). By single-cell analysis of diverse lymphoid  
481 subsets, we found Tregs co-expressing both *TIGIT* and *CTLA-4* immune checkpoints  
482 and that were progressively enriched with increasing geospatial proximity to the LUADs  
483 – suggesting a value in combinatorial targeting of multiple checkpoints for  
484 immunotherapy of early-stage LUAD. We pinpointed B cell signatures implicated in actin  
485 remodeling and immunological synapse formation that are spatially enriched in the  
486 LUADs and progressively increased along the course of normal to preneoplasia and  
487 invasive LUAD. These data suggest important yet unexplored roles for B cell  
488 phenotypes in immune evolution of LUAD. Our spatial single-cell analysis also pointed  
489 to mechanisms by which the myeloid immune microenvironment permits LUAD  
490 pathogenesis. Our interrogation of macrophage subsets revealed downregulation/loss  
491 of antigen presentation in tumor-specific M2-like macrophages, whereby expression  
492 levels of MHC genes as well as genes involved in peptide transport and loading (*TAP1*,  
493 *TAP2*, *TAPBP*; (38)) were markedly reduced. Our study also unveiled relatively  
494 understudied immune subsets in LUAD. We found DC subclusters and programs that  
495 were recently reported in other sites (21), including a non-inflammatory cDC signature  
496 with higher expression of MHC class II genes and that is enriched in LUAD relative to  
497 matched preneoplastic or normal tissues, thereby possibly informing of immune cues  
498 that could be harnessed to manipulate the immunogenicity of tumors. We also identified  
499 an inflammatory tumor-depleted cDC cluster with increased expression of *CD163*,  
500 *CD36*, *CD14*, *S100A9*, and *S100A8*. Interestingly, dendritic *CD36* is a scavenger for the  
501 acquisition and presentation of cell surface antigens and subsequent sculpting of the  
502 Treg repertoire (39), yet the precise consequences of its stark absence in a LUAD-

503 specific cDC subset and the effect(s) on the tumor immune microenvironment warrant  
504 further investigation. Nevertheless, these findings, along with our observation of  
505 decreased expression of the inflammatory DC signature across normal lung to  
506 premalignant AAH up to LUAD, suggest that unique cDC subsets play critical roles in  
507 LUAD pathogenesis and, thus, could be potential targets for immune-based  
508 interception.

509  
510 Ligand-receptor mediated interactions are known to be the main forms of interactions  
511 responsible for cellular signaling mechanisms and cell-to-cell communication, which is  
512 especially important during carcinogenesis and immune response (22). A better  
513 understanding of cell-to-cell communication networks, particularly ligand-receptor  
514 mediated interactions, may help elucidate tumor-immune co-evolution and immune  
515 reprogramming, and thus, help identify potential therapeutic targets. However, this has  
516 been hampered by the lack of bioinformatics tools for efficient data analysis and  
517 visualization. In this study, we applied the iTALK tool (23) developed by our group and  
518 performed a deep analysis of cellular interaction networks. We identified significant  
519 immune checkpoint- (e.g. *CD24*, *Galectin-9*, or *TIM-3*) and cytokine- (e.g. *CX3CL1*)  
520 receptor interactions whose enrichment or depletion in the LUAD space signified a  
521 highly pro-tumorigenic milieu. These findings are in accordance with the CD24–Siglec-  
522 10 interaction and subsequent “do not eat me” signal recently highlighted in breast  
523 cancer (40). Additionally, our findings of prominently increased expression of *CD24* in  
524 hyperplastic precursors (AAH) and LUADs compared to normal lung, and its association  
525 with pro-tumor and immunosuppressive phenotypes in this pathologic continuum,  
526 propose immune functions for CD24 in lung cancer that extend beyond its prognostic  
527 role (41) and that can be harnessed for early intervention. Overall, our interactome  
528 analyses implicate novel or understudied immune subsets as culprits in LUAD  
529 pathogenesis and provide a rationale for expanding the armamentarium of immune-  
530 based cancer therapies.

531  
532 In summary, our results provide a spatial atlas of early-stage LUAD and its nearby and  
533 distant lung ecosystem. This atlas comprises high cellular heterogeneity as well as

534 spatial dynamics in cell populations, cell states and their transcriptomic features that  
535 underlie evolution of the LUAD from the peripheral lung ecosystem. Our extensive  
536 transcriptomic dataset of lung epithelial and immune cells, other populations such as  
537 stromal and endothelial subsets, as well as of tumor-pertinent cell-cell interactions  
538 constitutes a valuable resource to functionally interrogate LUAD trajectories at high  
539 resolution and generate strategies for its early treatment. Also, our study's multi-region  
540 sampling design in conjunction with single-cell analysis could help address specific  
541 questions in early malignant and immune biology of other solid tumors.

542

543

## 544 **METHODS**

545 *Additional description of methods can be found in the Supplementary Data file.*

546

### 547 **Multi-region sampling of surgically resected LUADs and spatial normal lung** 548 **tissue specimens**

549 Patients undergoing surgical resection for primary early-stage lung adenocarcinoma (I-  
550 IIIA) and who had not received any preoperative therapy were carefully selected for  
551 derivation of multi-region samples for single cell analysis (**Supplementary Table S1**).

552 All patients were evaluated at the University of Texas MD Anderson Cancer Center and  
553 had provided informed consents under approved institutional review board protocols.

554 Immediately following surgery, resected tissues were processed on ice by an  
555 experienced pathologist assistant (PB). One side of the specimen was documented and  
556 measured, followed by identification of tumor margin, mapping defined collection sites in  
557 one direction along the length of the specimen and spanning the entire lobe, and  
558 making incisions into the surface of the lobe for specimen collection according to the  
559 following criteria. Based on the placement of the tumor within the specimen, tumor-  
560 adjacent and -distant normal parenchyma specimen were assigned at 0.5 cm from the  
561 tumor edge and from the periphery of the overall specimen/lobe (furthest distance from  
562 the tumor), respectively. An additional tumor-intermediate normal tissue was selected  
563 for P2-5 that ranged between 3-5 cm from the edge of the tumor. Sample collection was  
564 initiated at normal lung tissues that are farthest from the tumor moving inwards towards

565 the tumor to minimize cross-contamination during collection, with each sample being  
566 immediately placed in ice-cold RPMI medium supplemented with 2% fetal bovine  
567 serum, and transported to the processing lab on ice.

568

### 569 **Single cell derivation and scRNA-seq processing**

570 Tumor and spatial normal parenchyma tissues (n = 19 samples) were immediately  
571 minced and enzymatically digested, as previously described ((42), Supplementary  
572 Data). Following red blood cell removal, cells were filtered and counted. Cells were  
573 sorted (by FACS) for viable singlets cells (and also EPCAM+/- fractions from P2-P5).  
574 Sorted fractions were then loaded on individual channels of 10X Chromium Microfluidic  
575 chips, targeting up to 10,000 cells per fraction. Gene expression libraries were  
576 generated according to manufacturer's instructions using Chromium Next GEM Single  
577 Cell 5' Gel Bead Kit v1.1 (1000169, 10X Genomics), and sequenced on Illumina  
578 NovaSeq 6000 platform (Supplementary Data).

579

### 580 **scRNA-seq data analysis**

581 Single-cell analyses were performed using available computational framework. Raw  
582 scRNA-seq data were pre-processed, demultiplexed, aligned to human GRCh38  
583 reference and feature-barcodes generated using CellRanger (10X Genomics, version  
584 3.0.2). Details of quality control including quality check, data filtering, identification and  
585 removal of cellular debris, doublets and multiplets, batch effect evaluation and  
586 correction are found in Supplementary Methods. Following quality filtering, a total of  
587 186,916 cells were retained for downstream analysis. Raw unique molecular identifier  
588 (UMI) counts were log normalized and used for principal component analysis using  
589 Seurat (43). The output was then processed by Harmony (44) for batch effect correction,  
590 followed by unsupervised clustering analysis using Seurat (43). Uniform Manifold  
591 Approximation and Projection (UMAP) clustering (45) was used for visualization.  
592 *EPCAM*<sup>+</sup> cells were partitioned into major airway lineage clusters, followed by  
593 subclustering within each compartment/lineage to identify subpopulations. In addition,  
594 we applied single-cell consensus clustering (SC3) approach (46) for unsupervised

595 clustering analysis. SC3 was run with default parameters and independent of cell  
596 lineage annotation. Differentially expressed genes (DEGs) for each cell cluster were  
597 identified using the *FindAllMarkers* function in Seurat R package. We applied an  
598 integrative approach to define the cell type and determine its functional state of each  
599 cluster, based on the enrichment of canonical marker genes, top-ranked DEGs in each  
600 cell cluster, and the global cluster distribution, as previously described (47). For  
601 transcriptional signature analysis, single-sample GSVA (ssGSVA) was applied to the  
602 scRNA-seq data and pathway scores were calculated for each cell using *gsva* function  
603 in GSVA software package (48).

604 To study hierarchical relationships among cell types identified in this study, pairwise  
605 Spearman correlations were calculated from average expression level (*Seurat* function  
606 *AverageExpression*) of each cell type, based on which Euclidean distances between  
607 cell types were calculated. Unsupervised hierarchical cluster analysis was performed  
608 using the R function *hclust*, and the dendrogram was drawn using R package  
609 *dendextend*. Monocle 2 (version 2.10.1) (49) was applied to construct single-cell  
610 trajectories. The tool *inferCNV* (<https://github.com/broadinstitute/inferCNV>) was applied  
611 to infer large-scale CNVs from scRNA-seq data using NK cells from the same dataset  
612 as a control. Malignant cells were distinguished from non-malignant subsets based on  
613 information integrated from multiple sources including cluster distribution of the cells,  
614 marker genes expression, inferred large-scale CNVs, and presence of the *KRAS*  
615 mutation. For single-cell somatic *KRAS* mutation analysis, the reads were extracted  
616 from the original BAM files using cell-specific barcodes and genomic coordinates of  
617 *KRAS* hot spot mutations and then subjected to quality filtering and duplicates removal,  
618 followed by mutation identification and annotation. Extracted alignments were manually  
619 evaluated using IGV (50). To identify significant ligand-receptor pairs among major cell  
620 lineages (CD4 T cells, CD8 T cells, B cells, macrophages, dendritic cells, endothelial  
621 cells, epithelial cells and fibroblasts), the top 30% of most highly expressed genes were  
622 included in the analysis. Significant cellular interactions were identified using iTALK as  
623 previously described (23). For ligand-receptor annotation, the iTALK built-in ligand-  
624 receptor database was used.

625

## 626 **Statistical analysis**

627 In addition to the bioinformatics approaches described above for scRNA-seq data  
628 analysis, all other statistical analyses were performed using R package v3.6.0. Pseudo-  
629 bulk gene expression values for defined cell clusters were calculated by taking mean  
630 expression of each gene across all cells in a specific cluster. Pearson's correlation  
631 analysis was used to identify genes significantly correlated with *CD24* expression. All  
632 statistical significance testing was two-sided, and results were considered statistically  
633 significant at  $p$  - value  $< 0.05$ . The Benjamini-Hochberg method was applied to control  
634 the false discovery rate (FDR) in multiple comparisons and to calculate adjusted  $p$  -  
635 value (q-values).

636

## 637 **Data Availability**

638 All sequencing data generated in this study will be deposited in the Gene Expression  
639 Omnibus.

640 **REFERENCES**

641

- 642 1. Siegel RL, Miller KD, Jemal A. Cancer statistics, 2018. *CA: a cancer journal for*  
643 *clinicians* **2018**;68(1):7-30 doi 10.3322/caac.21442.
- 644 2. Goldstraw P, Ball D, Jett JR, Le Chevalier T, Lim E, Nicholson AG, *et al.* Non-  
645 small-cell lung cancer. *Lancet (London, England)* **2011**;378(9804):1727-40 doi  
646 10.1016/s0140-6736(10)62101-0.
- 647 3. Aberle DR, Adams AM, Berg CD, Black WC, Clapp JD, Fagerstrom RM, *et al.*  
648 Reduced lung-cancer mortality with low-dose computed tomographic screening.  
649 *The New England journal of medicine* **2011**;365(5):395-409 doi  
650 10.1056/NEJMoa1102873.
- 651 4. Abbosh C, Venkatesan S, Janes SM, Fitzgerald RC, Swanton C. Evolutionary  
652 dynamics in pre-invasive neoplasia. *Current opinion in systems biology* **2017**;2:1-  
653 8 doi 10.1016/j.coisb.2017.02.009.
- 654 5. Saab S, Zalzale H, Rahal Z, Khalifeh Y, Sinjab A, Kadara H. Insights Into Lung  
655 Cancer Immune-Based Biology, Prevention, and Treatment. *Front Immunol*  
656 **2020**;11:159 doi 10.3389/fimmu.2020.00159.
- 657 6. Maynard A, McCoach CE, Rotow JK, Harris L, Haderk F, Kerr DL, *et al.* Therapy-  
658 Induced Evolution of Human Lung Cancer Revealed by Single-Cell RNA  
659 Sequencing. *Cell* **2020** doi <https://doi.org/10.1016/j.cell.2020.07.017>.
- 660 7. Lavin Y, Kobayashi S, Leader A, Amir ED, Elefant N, Bigenwald C, *et al.* Innate  
661 Immune Landscape in Early Lung Adenocarcinoma by Paired Single-Cell  
662 Analyses. *Cell* **2017**;169(4):750-65.e17 doi 10.1016/j.cell.2017.04.014.
- 663 8. Laughney AM, Hu J, Campbell NR, Bakhoun SF, Setty M, Lavallée V-P, *et al.*  
664 Regenerative lineages and immune-mediated pruning in lung cancer metastasis.  
665 *Nature Medicine* **2020**;26(2):259-69 doi 10.1038/s41591-019-0750-6.
- 666 9. Kim N, Kim HK, Lee K, Hong Y, Cho JH, Choi JW, *et al.* Single-cell RNA  
667 sequencing demonstrates the molecular and cellular reprogramming of  
668 metastatic lung adenocarcinoma. *Nature Communications* **2020**;11(1):2285 doi  
669 10.1038/s41467-020-16164-1.
- 670 10. Lambrechts D, Wauters E, Boeckx B, Aibar S, Nittner D, Burton O, *et al.*  
671 Phenotype molding of stromal cells in the lung tumor microenvironment. *Nature*  
672 *Medicine* **2018**;24(8):1277-89 doi 10.1038/s41591-018-0096-5.
- 673 11. Plasschaert LW, Žilionis R, Choo-Wing R, Savova V, Knehr J, Roma G, *et al.* A  
674 single-cell atlas of the airway epithelium reveals the CFTR-rich pulmonary  
675 ionocyte. *Nature* **2018**;560(7718):377-81 doi 10.1038/s41586-018-0394-6.
- 676 12. Treutlein B, Brownfield DG, Wu AR, Neff NF, Mantalas GL, Espinoza FH, *et al.*  
677 Reconstructing lineage hierarchies of the distal lung epithelium using single-cell  
678 RNA-seq. *Nature* **2014**;509(7500):371-5 doi 10.1038/nature13173.
- 679 13. Tirosh I, Venteicher AS, Hebert C, Escalante LE, Patel AP, Yizhak K, *et al.*  
680 Single-cell RNA-seq supports a developmental hierarchy in human  
681 oligodendroglioma. *Nature* **2016**;539(7628):309-13 doi 10.1038/nature20123.
- 682 14. Little DR, Gerner-Mauro KN, Flodby P, Crandall ED, Borok Z, Akiyama H, *et al.*  
683 Transcriptional control of lung alveolar type 1 cell development and maintenance

- 684 by NK homeobox 2-1. *Proc Natl Acad Sci U S A* **2019**;116(41):20545-55 doi  
685 10.1073/pnas.1906663116.
- 686 15. Desai TJ, Brownfield DG, Krasnow MA. Alveolar progenitor and stem cells in  
687 lung development, renewal and cancer. *Nature* **2014**;507(7491):190-4 doi  
688 10.1038/nature12930.
- 689 16. Finn J, Sottoriva K, Pajcini KV, Kitajewski JK, Chen C, Zhang W, *et al.* Dlk1-  
690 Mediated Temporal Regulation of Notch Signaling Is Required for Differentiation  
691 of Alveolar Type II to Type I Cells during Repair. *Cell Rep* **2019**;26(11):2942-  
692 54.e5 doi 10.1016/j.celrep.2019.02.046.
- 693 17. Treekitkarnmongkol W, Hassane M, Sinjab A, Chang K, Hara K, Rahal Z, *et al.*  
694 Augmented Lipocalin-2 is Associated with COPD and Counteracts Lung  
695 Adenocarcinoma Development. *Am J Respir Crit Care Med* **2020** doi  
696 10.1164/rccm.202004-1079OC.
- 697 18. Skoulidis F, Byers LA, Diao L, Papadimitrakopoulou VA, Tong P, Izzo J, *et al.*  
698 Co-occurring genomic alterations define major subsets of KRAS-mutant lung  
699 adenocarcinoma with distinct biology, immune profiles, and therapeutic  
700 vulnerabilities. *Cancer Discov* **2015**;5(8):860-77 doi 10.1158/2159-8290.CD-14-  
701 1236.
- 702 19. Arana E, Vehlow A, Harwood NE, Vigorito E, Henderson R, Turner M, *et al.*  
703 Activation of the small GTPase Rac2 via the B cell receptor regulates B cell  
704 adhesion and immunological-synapse formation. *Immunity* **2008**;28(1):88-99 doi  
705 10.1016/j.immuni.2007.12.003.
- 706 20. Sivakumar S, Lucas FAS, McDowell TL, Lang W, Xu L, Fujimoto J, *et al.*  
707 Genomic Landscape of Atypical Adenomatous Hyperplasia Reveals Divergent  
708 Modes to Lung Adenocarcinoma. *Cancer research* **2017**;77(22):6119-30 doi  
709 10.1158/0008-5472.Can-17-1605.
- 710 21. Villani AC, Satija R, Reynolds G, Sarkizova S, Shekhar K, Fletcher J, *et al.*  
711 Single-cell RNA-seq reveals new types of human blood dendritic cells,  
712 monocytes, and progenitors. *Science (New York, NY)* **2017**;356(6335) doi  
713 10.1126/science.aah4573.
- 714 22. Maman S, Witz IP. A history of exploring cancer in context. *Nat Rev Cancer*  
715 **2018**;18(6):359-76 doi 10.1038/s41568-018-0006-7.
- 716 23. Wang Y, Wang R, Zhang S, Song S, Jiang C, Han G, *et al.* iTALK: an R Package  
717 to Characterize and Illustrate Intercellular Communication. *bioRxiv* **2019**:507871  
718 doi 10.1101/507871.
- 719 24. Cancer Genome Atlas Research N. Comprehensive molecular profiling of lung  
720 adenocarcinoma. *Nature* **2014**;511(7511):543-50 doi 10.1038/nature13385.
- 721 25. Schmall A, Al-Tamari HM, Herold S, Kampschulte M, Weigert A, Wietelmann A,  
722 *et al.* Macrophage and cancer cell cross-talk via CCR2 and CX3CR1 is a  
723 fundamental mechanism driving lung cancer. *Am J Respir Crit Care Med*  
724 **2015**;191(4):437-47 doi 10.1164/rccm.201406-1137OC.
- 725 26. Belinsky SA, Palmisano WA, Gilliland FD, Crooks LA, Divine KK, Winters SA, *et*  
726 *al.* Aberrant promoter methylation in bronchial epithelium and sputum from  
727 current and former smokers. *Cancer Res* **2002**;62(8):2370-7.



- 728 27. Powell CA, Klares S, O'Connor G, Brody JS. Loss of heterozygosity in epithelial  
729 cells obtained by bronchial brushing: clinical utility in lung cancer. *Clin Cancer*  
730 *Res* **1999**;5(8):2025-34.
- 731 28. Zhang J, Fujimoto J, Zhang J, Wedge DC, Song X, Zhang J, *et al.* Intratumor  
732 heterogeneity in localized lung adenocarcinomas delineated by multiregion  
733 sequencing. *Science* **2014**;346(6206):256-9 doi 10.1126/science.1256930.
- 734 29. Chen Z, Fillmore CM, Hammerman PS, Kim CF, Wong K-K. Non-small-cell lung  
735 cancers: a heterogeneous set of diseases. *Nature reviews Cancer*  
736 **2014**;14(8):535-46 doi 10.1038/nrc3775.
- 737 30. McFadden DG, Politi K, Bhutkar A, Chen FK, Song X, Pirun M, *et al.* Mutational  
738 landscape of EGFR-, MYC-, and Kras-driven genetically engineered mouse  
739 models of lung adenocarcinoma. *Proceedings of the National Academy of*  
740 *Sciences of the United States of America* **2016**;113(42):E6409-E17 doi  
741 10.1073/pnas.1613601113.
- 742 31. Moschen AR, Gerner RR, Wang J, Klepsch V, Adolph TE, Reider SJ, *et al.*  
743 Lipocalin 2 Protects from Inflammation and Tumorigenesis Associated with Gut  
744 Microbiota Alterations. *Cell Host Microbe* **2016**;19(4):455-69 doi  
745 10.1016/j.chom.2016.03.007.
- 746 32. Zauri M, Berridge G, Thézénas ML, Pugh KM, Goldin R, Kessler BM, *et al.* CDA  
747 directs metabolism of epigenetic nucleosides revealing a therapeutic window in  
748 cancer. *Nature* **2015**;524(7563):114-8 doi 10.1038/nature14948.
- 749 33. Snyder EL, Watanabe H, Magendantz M, Hoersch S, Chen TA, Wang DG, *et al.*  
750 Nkx2-1 represses a latent gastric differentiation program in lung  
751 adenocarcinoma. *Mol Cell* **2013**;50(2):185-99 doi 10.1016/j.molcel.2013.02.018.
- 752 34. Yamaguchi T, Hosono Y, Yanagisawa K, Takahashi T. NKX2-1/TTF-1: an  
753 enigmatic oncogene that functions as a double-edged sword for cancer cell  
754 survival and progression. *Cancer Cell* **2013**;23(6):718-23 doi  
755 10.1016/j.ccr.2013.04.002.
- 756 35. Winslow MM, Dayton TL, Verhaak RG, Kim-Kiselak C, Snyder EL, Feldser DM,  
757 *et al.* Suppression of lung adenocarcinoma progression by Nkx2-1. *Nature*  
758 **2011**;473(7345):101-4 doi 10.1038/nature09881.
- 759 36. Quezada SA, Peggs KS, Simpson TR, Allison JP. Shifting the equilibrium in  
760 cancer immunoediting: from tumor tolerance to eradication. *Immunol Rev*  
761 **2011**;241(1):104-18 doi 10.1111/j.1600-065X.2011.01007.x.
- 762 37. Guo X, Zhang Y, Zheng L, Zheng C, Song J, Zhang Q, *et al.* Global  
763 characterization of T cells in non-small-cell lung cancer by single-cell  
764 sequencing. *Nat Med* **2018**;24(7):978-85 doi 10.1038/s41591-018-0045-3.
- 765 38. Seliger B, Maeurer MJ, Ferrone S. TAP off--tumors on. *Immunol Today*  
766 **1997**;18(6):292-9 doi 10.1016/s0167-5699(97)01052-9.
- 767 39. Perry JSA, Russler-Germain EV, Zhou YW, Purtha W, Cooper ML, Choi J, *et al.*  
768 Transfer of Cell-Surface Antigens by Scavenger Receptor CD36 Promotes  
769 Thymic Regulatory T Cell Receptor Repertoire Development and Allo-tolerance.  
770 *Immunity* **2018**;48(5):923-36.e4 doi 10.1016/j.immuni.2018.04.007.
- 771 40. Barkal AA, Brewer RE, Markovic M, Kowarsky M, Barkal SA, Zaro BW, *et al.*  
772 CD24 signalling through macrophage Siglec-10 is a target for cancer  
773 immunotherapy. *Nature* **2019**;572(7769):392-6 doi 10.1038/s41586-019-1456-0.

- 774 41. Kristiansen G, Schlüns K, Yongwei Y, Denkert C, Dietel M, Petersen I. CD24 is  
775 an independent prognostic marker of survival in nonsmall cell lung cancer  
776 patients. *British Journal of Cancer* **2003**;88(2):231-6 doi 10.1038/sj.bjc.6600702.
- 777 42. Slyper M, Porter CBM, Ashenberg O, Waldman J, Drokhylyansky E, Wakiro I, *et*  
778 *al.* A single-cell and single-nucleus RNA-Seq toolbox for fresh and frozen human  
779 tumors. *Nature Medicine* **2020**;26(5):792-802 doi 10.1038/s41591-020-0844-1.
- 780 43. Satija R, Farrell JA, Gennert D, Schier AF, Regev A. Spatial reconstruction of  
781 single-cell gene expression data. *Nat Biotechnol* **2015**;33(5):495-502 doi  
782 10.1038/nbt.3192.
- 783 44. Korsunsky I, Millard N, Fan J, Slowikowski K, Zhang F, Wei K, *et al.* Fast,  
784 sensitive and accurate integration of single-cell data with Harmony. *Nature*  
785 *Methods* **2019**;16(12):1289-96 doi 10.1038/s41592-019-0619-0.
- 786 45. Becht E, McInnes L, Healy J, Dutertre CA, Kwok IWH, Ng LG, *et al.*  
787 Dimensionality reduction for visualizing single-cell data using UMAP. *Nat*  
788 *Biotechnol* **2018** doi 10.1038/nbt.4314.
- 789 46. Kiselev VY, Kirschner K, Schaub MT, Andrews T, Yiu A, Chandra T, *et al.* SC3:  
790 consensus clustering of single-cell RNA-seq data. *Nature Methods*  
791 **2017**;14(5):483-6 doi 10.1038/nmeth.4236.
- 792 47. Sade-Feldman M, Yizhak K, Bjorgaard SL, Ray JP, de Boer CG, Jenkins RW, *et*  
793 *al.* Defining T Cell States Associated with Response to Checkpoint  
794 Immunotherapy in Melanoma. *Cell* **2018**;175(4):998-1013.e20 doi  
795 10.1016/j.cell.2018.10.038.
- 796 48. Hänzelmann S, Castelo R, Guinney J. GSVA: gene set variation analysis for  
797 microarray and RNA-Seq data. *BMC Bioinformatics* **2013**;14(1):7 doi  
798 10.1186/1471-2105-14-7.
- 799 49. Cao J, Spielmann M, Qiu X, Huang X, Ibrahim DM, Hill AJ, *et al.* The single-cell  
800 transcriptional landscape of mammalian organogenesis. *Nature*  
801 **2019**;566(7745):496-502 doi 10.1038/s41586-019-0969-x.
- 802 50. Robinson JT, Thorvaldsdóttir H, Wenger AM, Zehir A, Mesirov JP. Variant  
803 Review with the Integrative Genomics Viewer. *Cancer Res* **2017**;77(21):e31-e4  
804 doi 10.1158/0008-5472.Can-17-0337.

805

806 **FIGURE LEGENDS**

807

808 **Figure 1. Dissecting early-stage LUAD and the peripheral lung ecosystem using**  
809 **single-cell RNA sequencing. A,** Workflow showing multi-region sampling strategy of  
810 five LUADs and fourteen spatially defined normal lung tissues for analysis by scRNA-  
811 seq. Dis, distant normal; Int, intermediate normal; Adj, adjacent normal; LUAD, tumor  
812 tissue. **B,** Uniform manifold approximation and projection (UMAP) embedding of cells  
813 from tumor, adjacent normal and distant normal samples of patient one (P1). Cells are  
814 colored by their inferred cell types. **C,** Cell composition in absolute cell numbers  
815 (stacked bar plots) and relative fractions (pie charts) in each spatial field sample derived  
816 from P1. **D,** UMAP view of cells from all five patients, including EPCAM+ and EPCAM-  
817 pre-enriched cells from P2-P5. Colors represent assigned major cell types. Cycling,  
818 cycling cells. **E,** UMAP view of cell types by spatial fields. Colors represent assigned cell  
819 types as in panel D. Lollipop plots indicate, for each major cell type, the relative fraction  
820 of cells from each spatial field. Spatial fields are indicated by numbers according to  
821 panel A. **F,** Dendrograms showing hierarchical relationships of cells among the spatial  
822 fields based on the computed Euclidean distance using transcriptomic features.  
823 Dendrograms are shown for five major cell types (from left to right), for all patients  
824 together (top) and by patient (bottom). **G,** Same UMAP as in panel D, with further  
825 subclustering of lymphoid and myeloid cells. Colors correspond to the cell type  
826 annotation in panel H for EPCAM- cells. **H-I,** An area plot showing changes in the  
827 relative fractions among the EPCAM- subsets across spatial fields for all patients  
828 together and by patient (pie charts, panel I). Stacked bar plots in panel I show absolute  
829 cell numbers of the fractions by patient and spatial field.

830

831 **Figure 2. Epithelial lineage diversity and intratumoral heterogeneity in the spatial**  
832 **ecosystem of early-stage LUAD. A,** UMAP visualization of all EPCAM+ cells from P1-  
833 P5 colored (from left to right) by their assigned cell types, spatial fields, and inferred  
834 copy number variation (inferCNV) scores. **B,** Heatmap of major lineage marker genes  
835 for EPCAM+ cell clusters (C1-10 as shown in panel A, left), with corresponding bar blots

836 outlining relative contribution by spatial field. **C**, Area plot showing changes in EPCAM+  
837 subset fractions across spatial fields. **D**, Representative line plots displaying changes in  
838 abundance of non-malignant epithelial cell clusters across spatial fields (identified by  
839 the colors of the circles, in the same order as in panel C), with embedded pie charts  
840 showing the relative contribution of each spatial field. **E**, Hierarchical relationships of 3  
841 representative subsets of epithelial cells (from top to bottom) among the spatial fields  
842 based on the computed Euclidean distance using transcriptomic features (left), and  
843 corresponding heatmaps quantifying similarity levels among spatial fields (right).  
844 Similarity score is defined as one minus the Euclidean distance. **F**, UMAP plots of cells  
845 in the malignant-enriched cluster C9 (panel A), colored by their corresponding patient  
846 origin (left), spatial field (middle), and inferCNV score (right). The zoom in view of the  
847 right panel shows *KRAS* G12D mutant cells in P2. **G**, Fraction of cells carrying *KRAS*  
848 G12D mutation (left bar plot), with numbers indicating the absolute cell numbers, as well  
849 as expression levels of *KRAS* (violin plot, top right) and *MUC5AC* (violin plot, bottom  
850 right), within cells of each epithelial lineage cluster of P2. **H**, Unsupervised clustering of  
851 CNV profiles inferred from scRNA-seq data from patient P3 (left) and P5 (right) tumor  
852 samples and demonstrating intratumoral heterogeneity in CNV profiles. Chromosomal  
853 amplifications (red) and deletions (blue) are inferred for all 22 chromosomes (color bars  
854 on the top). Each row represents a single cell, with corresponding cell type annotated  
855 on the right (same as in panel A). **I**, Potential developmental trajectories for EPCAM+  
856 cells from P3 (top) and P5 (bottom) inferred by Monocle 3 analysis. Cells on the tree are  
857 colored by pseudotime (dotted boxes) and inferCNV clusters.

858

859 **Figure 3. Spatial reprogramming of lymphoid subsets towards protumor**  
860 **phenotypes in early-stage LUAD. A**, UMAP visualization of lymphoid cell subsets  
861 from P1-P5 colored by cell lineage (left) and spatial field (right). CTL, cytotoxic T  
862 lymphocyte; Treg, T regulatory cell; ILC, innate lymphoid cell; NK, natural killer cell. **B**,  
863 Bubble plot showing the expression of lineage markers. Both the fraction of cells  
864 expressing (indicated by the size of the circle) as well as their scaled expression levels  
865 (indicated by the color of the circle) are shown. **C**, Changes in the abundance of

866 lymphoid cell lineages and cellular states across the LUADs and spatial normal  
867 samples. Embedded pie charts show the contribution of each spatial sample to the  
868 indicated cell subtype/state. **D**, UMAP plots of CD8+ T lymphocytes colored by cell  
869 states (top), spatial field (middle), and cytotoxic score (bottom). The heatmap on the  
870 right shows normalized expression of marker genes for defined CD8 T cell subsets.  
871 Each column represents a cell. Top annotation tracks indicate (from top to bottom) cell  
872 states, naïve T cell scores and cytotoxic scores calculated using curated gene  
873 signatures, and the corresponding spatial field of each cell. **E**, Depletion of CD8+  
874 GNLY-hi CTLs in the tumor microenvironment of LUADs. Bar plot (top left) and boxplot  
875 (top middle) showing percentage of CD8+ GNLY-hi CTLs among total CD8+ cells from  
876 all patients across the spatial fields. Each circle in the boxplot represents a patient  
877 sample. *P* - value was calculated using Kruskal-Wallis test. Cytotoxicity signature score  
878 (violin plot, top right) of CD8+ CTLs across spatial fields (\*, *P* < 0.05; \*\*, *P* < 0.01; \*\*\*, *P*  
879 < 0.001). *P* - values were calculated using Wilcoxon rank sum test. The percentage of  
880 CD8+ CTLs expressing cytotoxic signature genes (indicated by the size of the circle)  
881 and their scaled expression levels (indicated by the color of the circle) across the  
882 LUADs and spatial normal lung samples (bubble plot, bottom left). Expression levels of  
883 *NKG7* and *GNLY* in CD8+ CTLs across the spatial samples (violin plots, bottom right).  
884 **F**, UMAP plots of CD4+ T lymphocytes colored by cell states (top), spatial field (middle),  
885 and Treg signature score (bottom). The heatmap on the right shows normalized  
886 expression of marker genes for CD4+ T cells grouped by defined subcluster. Each  
887 column represents a cell. Top annotation tracks indicate (from top to bottom) cell states,  
888 Treg signature score, cytotoxic scores, and naïve T cell score calculated using curated  
889 gene signatures, and the corresponding spatial field of each cell. **G**, Enrichment of  
890 CD4+ T regulatory cells (Treg) in the tumor microenvironment of LUADs. Bar plot (top  
891 left) and boxplot (top middle) showing percentage of CD4 Tregs among total CD4+ cells  
892 from all patients across the spatial fields. Each circle in the boxplot represents a patient  
893 sample. *P* - value was calculated using Kruskal-Wallis test. Percentage of CD4+ Tregs  
894 expressing inhibitory immune checkpoint genes (indicated by the size of the circle) and  
895 their scaled expression levels (indicated by the color of the circle, color assignment  
896 same as panel E) across the spatial samples (bubble plot, top right). Frequency of

897 CD4+ Treg cells co-expressing *CTLA4* and *TIGIT* immune checkpoints across the  
898 spatial samples (scatter plots, bottom). The fractions of *CTLA4+TIGIT+* Tregs are  
899 labeled on each plot.

900

901 **Figure 4. Reduced signatures of antigen presentation and inflammatory dendritic**  
902 **cells in the microenvironment of early-stage LUAD. A**, UMAP visualization of  
903 myeloid cell lineages colored by cell type/state (left) and the spatial fields (right). Mac,  
904 macrophages; Mono, monocytes; DC, dendritic cell; cDC, classical dendritic cell; pDC,  
905 plasmacytoid dendritic cell. **B**, Bubble plot showing the percentage of myeloid cells  
906 expressing lineage specific marker genes (indicated by the size of the circle) as well as  
907 their scaled expression levels (indicated by the color of the circle). **C**, Changes in the  
908 abundance of myeloid cell subsets across the LUADs and spatial normal lung samples.  
909 Embedded pie charts show the contribution of each spatial sample to the indicated cell  
910 subtype/state. **D**, UMAP plot of monocyte and macrophage subpopulations, color coded  
911 by cell type/state (left), spatial field (middle), and antigen presentation score (right). **E**,  
912 The percentage of M2-like macrophages cluster 1 expressing antigen presentation  
913 genes (indicated by the size of the circle) and their scaled expression levels (indicated  
914 by the color of the circle) across the spatial samples (bubble plot). **F**, Ridge plots  
915 showing the expression levels of MHC class I and MHC class II genes in M2-like  
916 macrophages cluster 1, and across LUADs and spatial normal lung samples. **G**, Violin  
917 plots showing the antigen presentation score in M2-like macrophages (clusters 1 and 5)  
918 across LUADs and spatial normal lung samples for all patients together (left) and within  
919 patients (right) (\*\*\*,  $P < 0.001$ ).  $P$  – values were calculated by Wilcoxon rank sum test.  
920 **H**, UMAP plots of dendritic cells, color coded by cell state (left) and spatial field (right). **I**,  
921 UMAP plots showing unsupervised subclustering of cDC2 cells colored by cluster ID  
922 (top left), spatial field (top right) and the computed inflammatory signature score  
923 (bottom). **J**, Heatmap showing normalized expression of marker genes of cDC2 cell  
924 subsets. The top annotation tracks indicate (from top to bottom) the inflammatory  
925 signature scores, spatial field tissue of origins, and cDC2 cell clusters. **K**, Bubble plot  
926 showing the percentage of cDC2 cells expressing inflammatory and non-inflammatory

927 signature genes (indicated by the size of the circle) as well as their scaled expression  
928 levels (indicated by the color of the circle) in the LUADs and spatial normal lung tissues.  
929 **L, M**, Depletion of inflammatory cDC2 cluster C2 cells in the tumor microenvironment of  
930 LUADs. Bar plot (**L**) and boxplot (**M**) showing fraction of cDC2 C2 cells among total  
931 cDC2 cells and across the LUADs and spatial normal lung tissues. Individual circles in  
932 (**M**) correspond to patient samples.  $P$  - value was calculated using Kruskal-Wallis test.  
933 **N**, Violin plot showing the inflammatory signature scores in cDC2 C2 cells across  
934 LUADs and spatial normal lung samples. **O**, boxplot showing the inflammatory signature  
935 score in normal lung (NL), in premalignant atypical adenomatous hyperplasia (AAH) and  
936 in LUAD from an independent cohort (\*,  $P < 0.05$ ; \*\*,  $P < 0.01$ ; \*\*\*,  $P < 0.001$ ; N.S,  $P >$   
937  $0.05$  of the Wilcoxon rank sum test).

938

939 **Figure 5. Enriched ligand-receptor cell-cell communication networks between**  
940 **LUADs and their immune microenvironment.** **A**, Computational analysis workflow of  
941 cell-cell communication using iTALK to identify, from a database of curated ligand-  
942 receptor (L-R) pairs, the highly expressed immune checkpoint- and cytokine-receptor  
943 pairs, that are significantly and differentially altered (i.e. interactions lost or gained)  
944 between LUADs and spatial normal lung tissues. **B**, Heatmaps showing the overlap  
945 (quantified by Jaccard index) of predicted ligand-receptor based interactions among  
946 individual LUADs and their corresponding spatially distributed normal lung tissues. **C**,  
947 Representative circos plots showing details of immune checkpoint-mediated L-R pairs  
948 compared between each of the LUADs of patients 2, 3, and 5, and selected matching  
949 spatial normal lung samples. **D**, Violin plots showing expression of the ligand and  
950 receptor genes (selected from panel C) involving immune checkpoints and showing  
951 spatial gain-of-interaction patterns as highlighted in panel C. **E**, Boxplot showing *CD24*  
952 expression levels in an independent cohort of normal lung tissues (NL), premalignant  
953 atypical adenomatous hyperplasias (AAH) and LUADs assessed using the Nanostring  
954 immune Counter panel (see Supplementary Methods) (\*,  $P < 0.05$ ; \*\*,  $P < 0.01$ ; \*\*\*,  $P <$   
955  $0.001$ ; N.S,  $P > 0.05$  of the Wilcoxon rank sum test). **F**, Scatterplots using Pearson  
956 correlation coefficients between levels of *CD24* with *EPCAM* and *PRF1* in the NL, AAH,

957 and LUAD samples. **G**, Boxplot depicting *CD24* expression levels in LUADs and  
958 matched normal lung tissues (NL) from the TCGA LUAD cohort (\*,  $P < 0.05$ ; \*\*,  $P <$   
959  $0.01$ ; \*\*\*,  $P < 0.001$ ; N.S,  $P > 0.05$  of the Wilcoxon rank sum test). **H**, Scatterplots  
960 showing correlation of expression using Pearson's correlation coefficients between  
961 *CD24* with *EPCAM* and *PRF1*.

## 962 **Supplementary Figure Legends**

963  
964 **Supplementary Figure S1. Quality control metrics and expression of cell lineage**  
965 **markers across the spatial LUAD scRNA-seq dataset.** **A**, Statistical summary of cells  
966 passing quality control (QC) and showing cell number (left), fraction of mitochondrial  
967 genes (middle), and the number of detected genes (right) per sample. Dis, distant  
968 normal; Int, intermediate normal; Adj, adjacent normal; LUAD, tumor tissue. **B-C**, UMAP  
969 plots showing cells colored by patient ID (B) and sample batch (C). **D-E**, Bubble plots  
970 showing the percentage of cells expressing lineage markers (indicated by the size of the  
971 circle) as well as their scaled expression levels (indicated by the color of the circle)  
972 across all cells (D; related to main Fig. 1D and E) or selected cell types (E; related to  
973 main Fig. 1 G and H). NK; natural killer cell, DC; dendritic cell, EC; endothelial cell.

974  
975 **Supplementary Figure S2. Trajectory analysis of alveolar cells and copy number**  
976 **inference of malignant-enriched cells.** **A**, UMAP view showing *EPCAM*<sup>+</sup> cells colored  
977 by sample batch. **B**, Bar plot showing absolute numbers of cells for each lung epithelial  
978 cell lineage. Dis, distant normal; Int, intermediate normal; Adj, adjacent normal; LUAD,  
979 tumor tissue; AT1, alveolar type 1; AT2, alveolar type 2. **C**, Potential developmental  
980 trajectory for alveolar cells inferred by pseudotime analysis. Cells were ordered by  
981 pseudotime (dotted box) and colored by alveolar cell state. **D**, Bubble plots showing the  
982 percentage (indicated by the size of the circle) of cells expressing markers of alveolar  
983 states shown in trajectory analysis from panel C as well as their scaled expression  
984 levels (indicated by the color of the circle). **E**, Pseudotime trajectory in C showing cells  
985 colored by Notch signaling signature score. **F**, Plots showing Notch signaling signature  
986 score among alveolar cell states in trajectory analysis from panel E. **G**, Heatmap  
987 showing inferCNV score of cells in the malignant-enriched cluster. **H**, UMAP plots



988 showing reclustering of malignant-enriched cells and highlighting those from patient 2 in  
989 red (P2; top). Bottom UMAP shows reclustering of P2 malignant-enriched cells and  
990 identifies (with red asterisk) those harboring *KRAS*-G12D mutation. **I**, Heatmap showing  
991 highly expressed genes among sub-clusters (subcluster of cells enriched with *KRAS*  
992 G12D mutations compared to subclusters lacking the mutation) identified in the bottom  
993 UMAP of panel H.

994

995 **Supplementary Figure S3. Reprogramming of lymphoid cell subsets towards an**  
996 **immune suppressive tumor microenvironment in early-stage LUAD. A**, UMAP of  
997 lymphoid cells colored by sample batch. **B**, Bar plots showing the absolute numbers of  
998 each lymphoid cell subset in each spatial sample. Dis, distant normal; Int, intermediate  
999 normal; Adj, adjacent normal; LUAD, tumor tissue; CTL, cytotoxic T lymphocyte; Treg, T  
1000 regulatory cell; ILC, innate lymphoid cell; NK, natural killer cell. **C**, Changes in the  
1001 abundance of specific lymphoid cellular lineages and states across the LUADs and  
1002 spatial normal samples. Embedded pie charts show the contribution of each spatial  
1003 sample to the indicated cell subtype/state. **D**, Cytotoxicity signature score in CD8+  
1004 *GNLY*<sub>hi</sub> CTLs in patient three (P3, left) and in patient 4 (P4, right) across spatial fields  
1005 (\*,  $P < 0.05$ ; \*\*,  $P < 0.01$ ; \*\*\*,  $P < 0.001$  of the Wilcoxon rank sum test). **E**, Treg  
1006 signature score in T regulatory cells across spatial fields in all patients (left), P3 (middle)  
1007 and in patient 5 (P5, right) (\*,  $P < 0.05$ ; \*\*,  $P < 0.01$ ; \*\*\*,  $P < 0.001$  of the Wilcoxon rank  
1008 sum test). **F**, Depletion of CD4+ CTLs in the tumor microenvironment of LUAD. Boxplot  
1009 showing percentage of CD4+ CTLs *GZMA*-hi among total CD4+ cells from all patients  
1010 across the spatial fields. Each circle represents a patient sample.  $P$  - value was  
1011 calculated using Kruskal-Wallis test. **G**, Violin plots showing cytotoxic signature score in  
1012 CD4+ CTL *GZMA*-hi cells from all patients (left) and P5 (right; \*,  $P < 0.05$ ; \*\*,  $P < 0.01$ ;  
1013 \*\*\*,  $P < 0.001$  of the Wilcoxon rank sum test). **H**, Frequency of CD4+ CTL *GZMA*-hi  
1014 cells co-expressing *GZMA* and *GZMH* across the spatial samples. The fractions of  
1015 *GZMA*+*GZMH*+ CD4+ CTLs are labeled on each plot. **I-K**, Expression profiling of  
1016 different isotypes of plasma cells across the spatial samples. **I**, Heatmap showing  
1017 isotype genes expression in plasma cells. **J**, Bar plots showing plasma cell isotype  
1018 composition across spatial fields. **K**, Dot plots showing the fractional change of IGHA1/2

1019 and IGHG3 across all patients and in each patient (left to right). **L-N**, Reprogramming of  
1020 B cells in early-stage LUAD. **L**, Heatmap showing unsupervised clustering of B cells  
1021 sub-populations. **M**, UMAP showing re-clustering of B cells into sub-populations. **N**,  
1022 Ridge plots (left) showing *RAC2* and *ACTG* expression levels among B cell sub-  
1023 clusters, and scatter plots (right) showing the frequency of B cells co-expressing *RAC2+*  
1024 and *ACTG+* across spatial fields. The fractions of *RAC2+ACTG+* B cells are labeled on  
1025 each plot. **O**, Boxplot showing the B cell C0 signature score in normal lung tissues (NL),  
1026 premalignant atypical adenomatous hyperplasias (AAH) and LUADs in an independent  
1027 validation cohort. (\*,  $P < 0.05$ ; \*\*,  $P < 0.01$ ; \*\*\*,  $P < 0.001$ ; N.S,  $P > 0.05$ ).  $P$  - values  
1028 were calculated using Wilcoxon rank sum test.

1029

#### 1030 **Supplementary Figure S4. Reprogramming of myeloid cells in the tumor**

1031 **microenvironment of early-stage LUAD. A**, UMAP view showing myeloid cells  
1032 colored by sample batch. **B**, Stacked bar plots showing absolute numbers of each  
1033 lymphoid cell subset across the spatial samples. Dis, distant normal; Int, intermediate  
1034 normal; Adj, adjacent normal; LUAD, tumor tissue; mono; monocytes, mac;  
1035 macrophages, cDC; classical dendritic cells, pDC; plasmacytoid dendritic cell. **C**,  
1036 Changes in the abundance of specific lymphoid cellular lineages and states across the  
1037 LUADs and spatial normal samples. Embedded pie charts show the contribution of each  
1038 spatial sample to the indicated cell subtype/state. **D**, Heatmap showing the expression  
1039 of inflammatory/non-inflammatory signature genes in cDC2 cells. **E**, Boxplot showing  
1040 the non-inflammatory *versus* inflammatory signature score in normal control (NL), in  
1041 normal lung tissues (NL), premalignant atypical adenomatous hyperplasias (AAH) and  
1042 LUADs in an independent validation cohort. (\*,  $P < 0.05$ ; \*\*,  $P < 0.01$ ; \*\*\*,  $P < 0.001$ ;  
1043 N.S,  $P > 0.05$ ).  $P$  - values were calculated using Wilcoxon rank sum test. **F**, Heatmap  
1044 showing DEGs between LUAD and normal samples in pDCs. **G**, Ridge plots showing  
1045 the expression level changes of *FOS*, *JUN* and *FOSB* in pDCs and across spatial  
1046 samples.

1047

1048 **Supplementary Figure S5. Composition and gene expression changes in stromal**  
1049 **and endothelial sub-populations in early-stage LUAD as well as adjacent and**

1050 **more distant normal lung tissues. A**, UMAP view of stromal and endothelial cells  
1051 colored by sample batch. **B**, UMAP view of stromal and endothelial sub-populations. **C**,  
1052 Bubble plot showing the percentage of stromal and endothelial cells expressing lineage  
1053 markers (indicated by the size of the circle) as well as their scaled expression levels  
1054 (indicated by the color of the circle). **D**, Bar plot showing the absolute number of cells  
1055 from each stromal and endothelial subset. Dis, distant normal; Int, intermediate normal;  
1056 Adj, adjacent normal; LUAD, tumor tissue; EC, endothelial cells. **E**, Changes in the  
1057 abundance of stromal and endothelial cell lineages across the LUADs and spatial  
1058 normal samples. Embedded pie charts show the contribution of each spatial sample to  
1059 the indicated stromal and endothelial subtype. **F**, Heatmap showing DEGs between  
1060 LUAD and normal samples in EC venule sub-populations. **G**, Bar plot showing  
1061 significantly enriched pathways of up/down regulated DEGs in panel F. **H**, Ridge plots  
1062 showing the expression level changes of *HLA-DPB1*, *IL33*, and *IGFBP7* in EC venule  
1063 sub-populations and across spatial samples.

1064

1065 **Supplementary Figure S6. Enriched ligand-receptor cell-cell communication**  
1066 **networks between LUAD and the immune microenvironment. A-B**, Circos plot  
1067 showing additional details of the immune checkpoint-mediated L-R pairs compared  
1068 between each of the LUADs of patients 5 and select matching spatial normal lung  
1069 samples. And **B**) Violin plot showing expression of epithelial *LGALS9* (ligand) and  
1070 dendritic cells *HAVCR2* (receptor) and showing spatial gain-of-interaction patterns as  
1071 highlighted in the circos plot of patient 5 (P5) in panel A. **C**, Circos plot showing details  
1072 of chemokine-mediated L-R pairs comparison between the LUAD and tumor-  
1073 intermediate normal tissue of patient 3 (P3). **D**, Violin plots showing spatial expression  
1074 of the chemokine and receptor genes in P3 and highlighted in panel C. **E**, Circos plots  
1075 showing details of chemokine-mediated L-R pairs comparison between the LUAD and  
1076 tumor-intermediate normal tissue of patient 2 (P2, panel E left) and patient 5 (P5, panel  
1077 E right). **F**, Violin plots showing spatial expression of the chemokine and receptor genes  
1078 in P5 and highlighted in panel E right. **G-H**, Scatterplots showing the correlation of  
1079 expression between *CD24* and other immune-regulated genes in GSE10251 (G) and in

1080 TCGA (H) LUAD cohorts. Pearson correlation test was used for p-values show in panel  
1081 G and panel H.

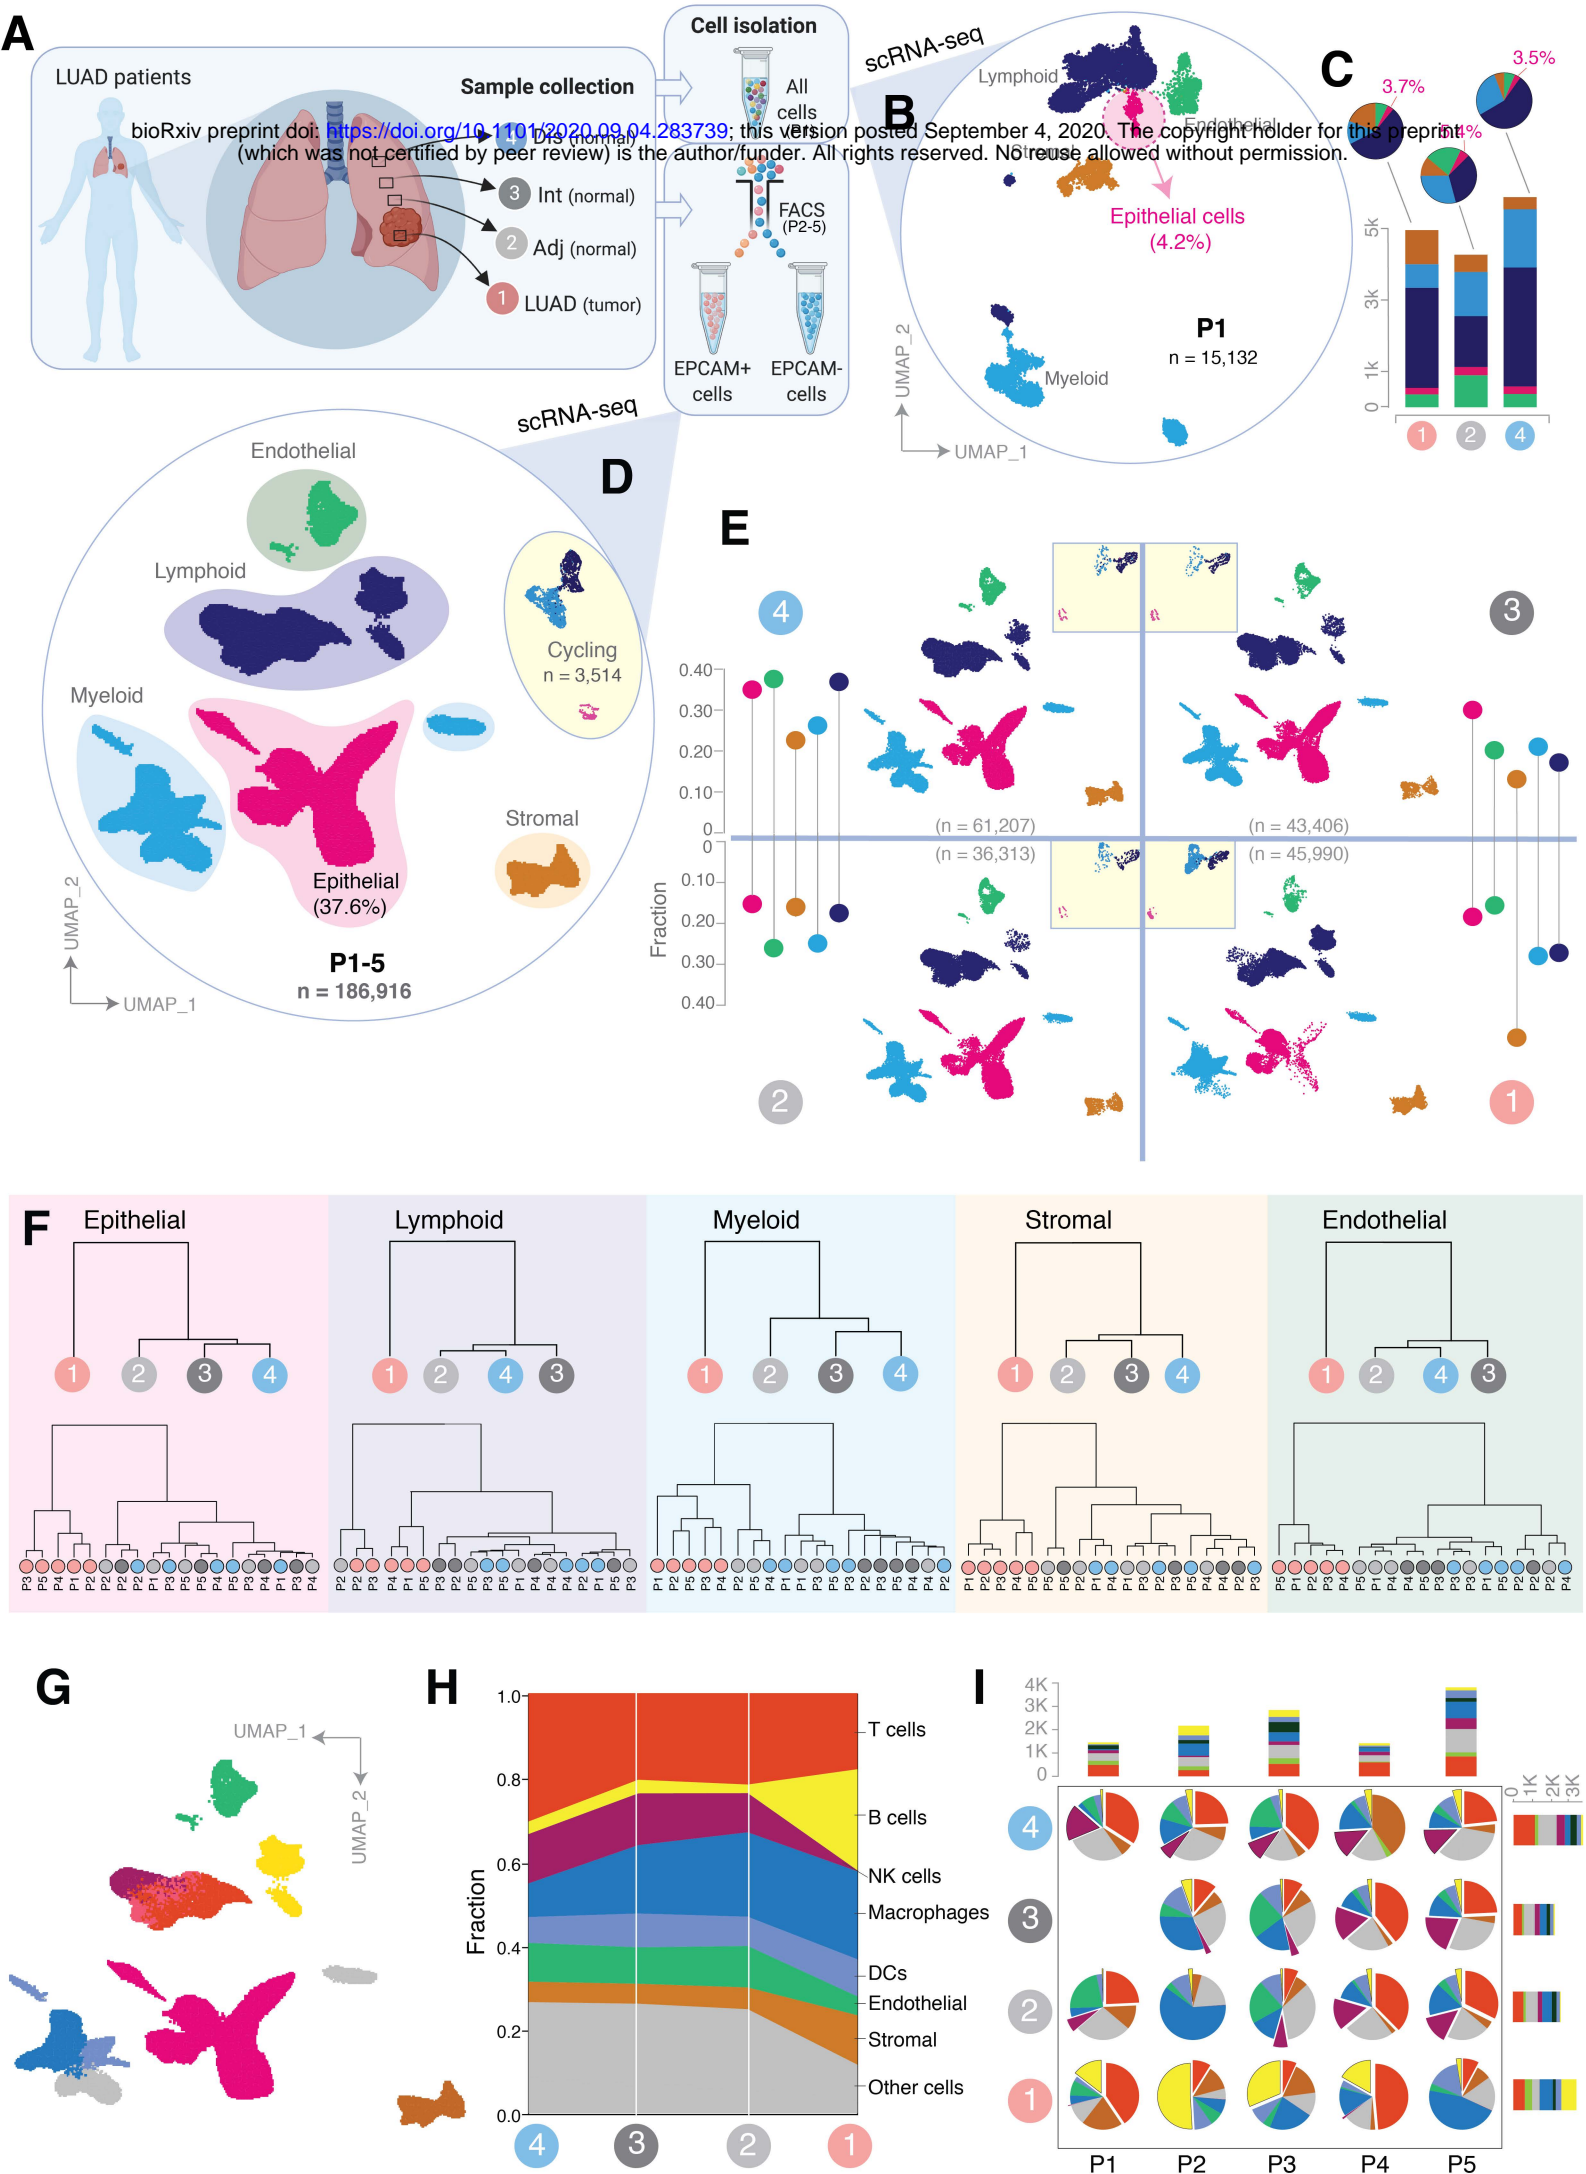

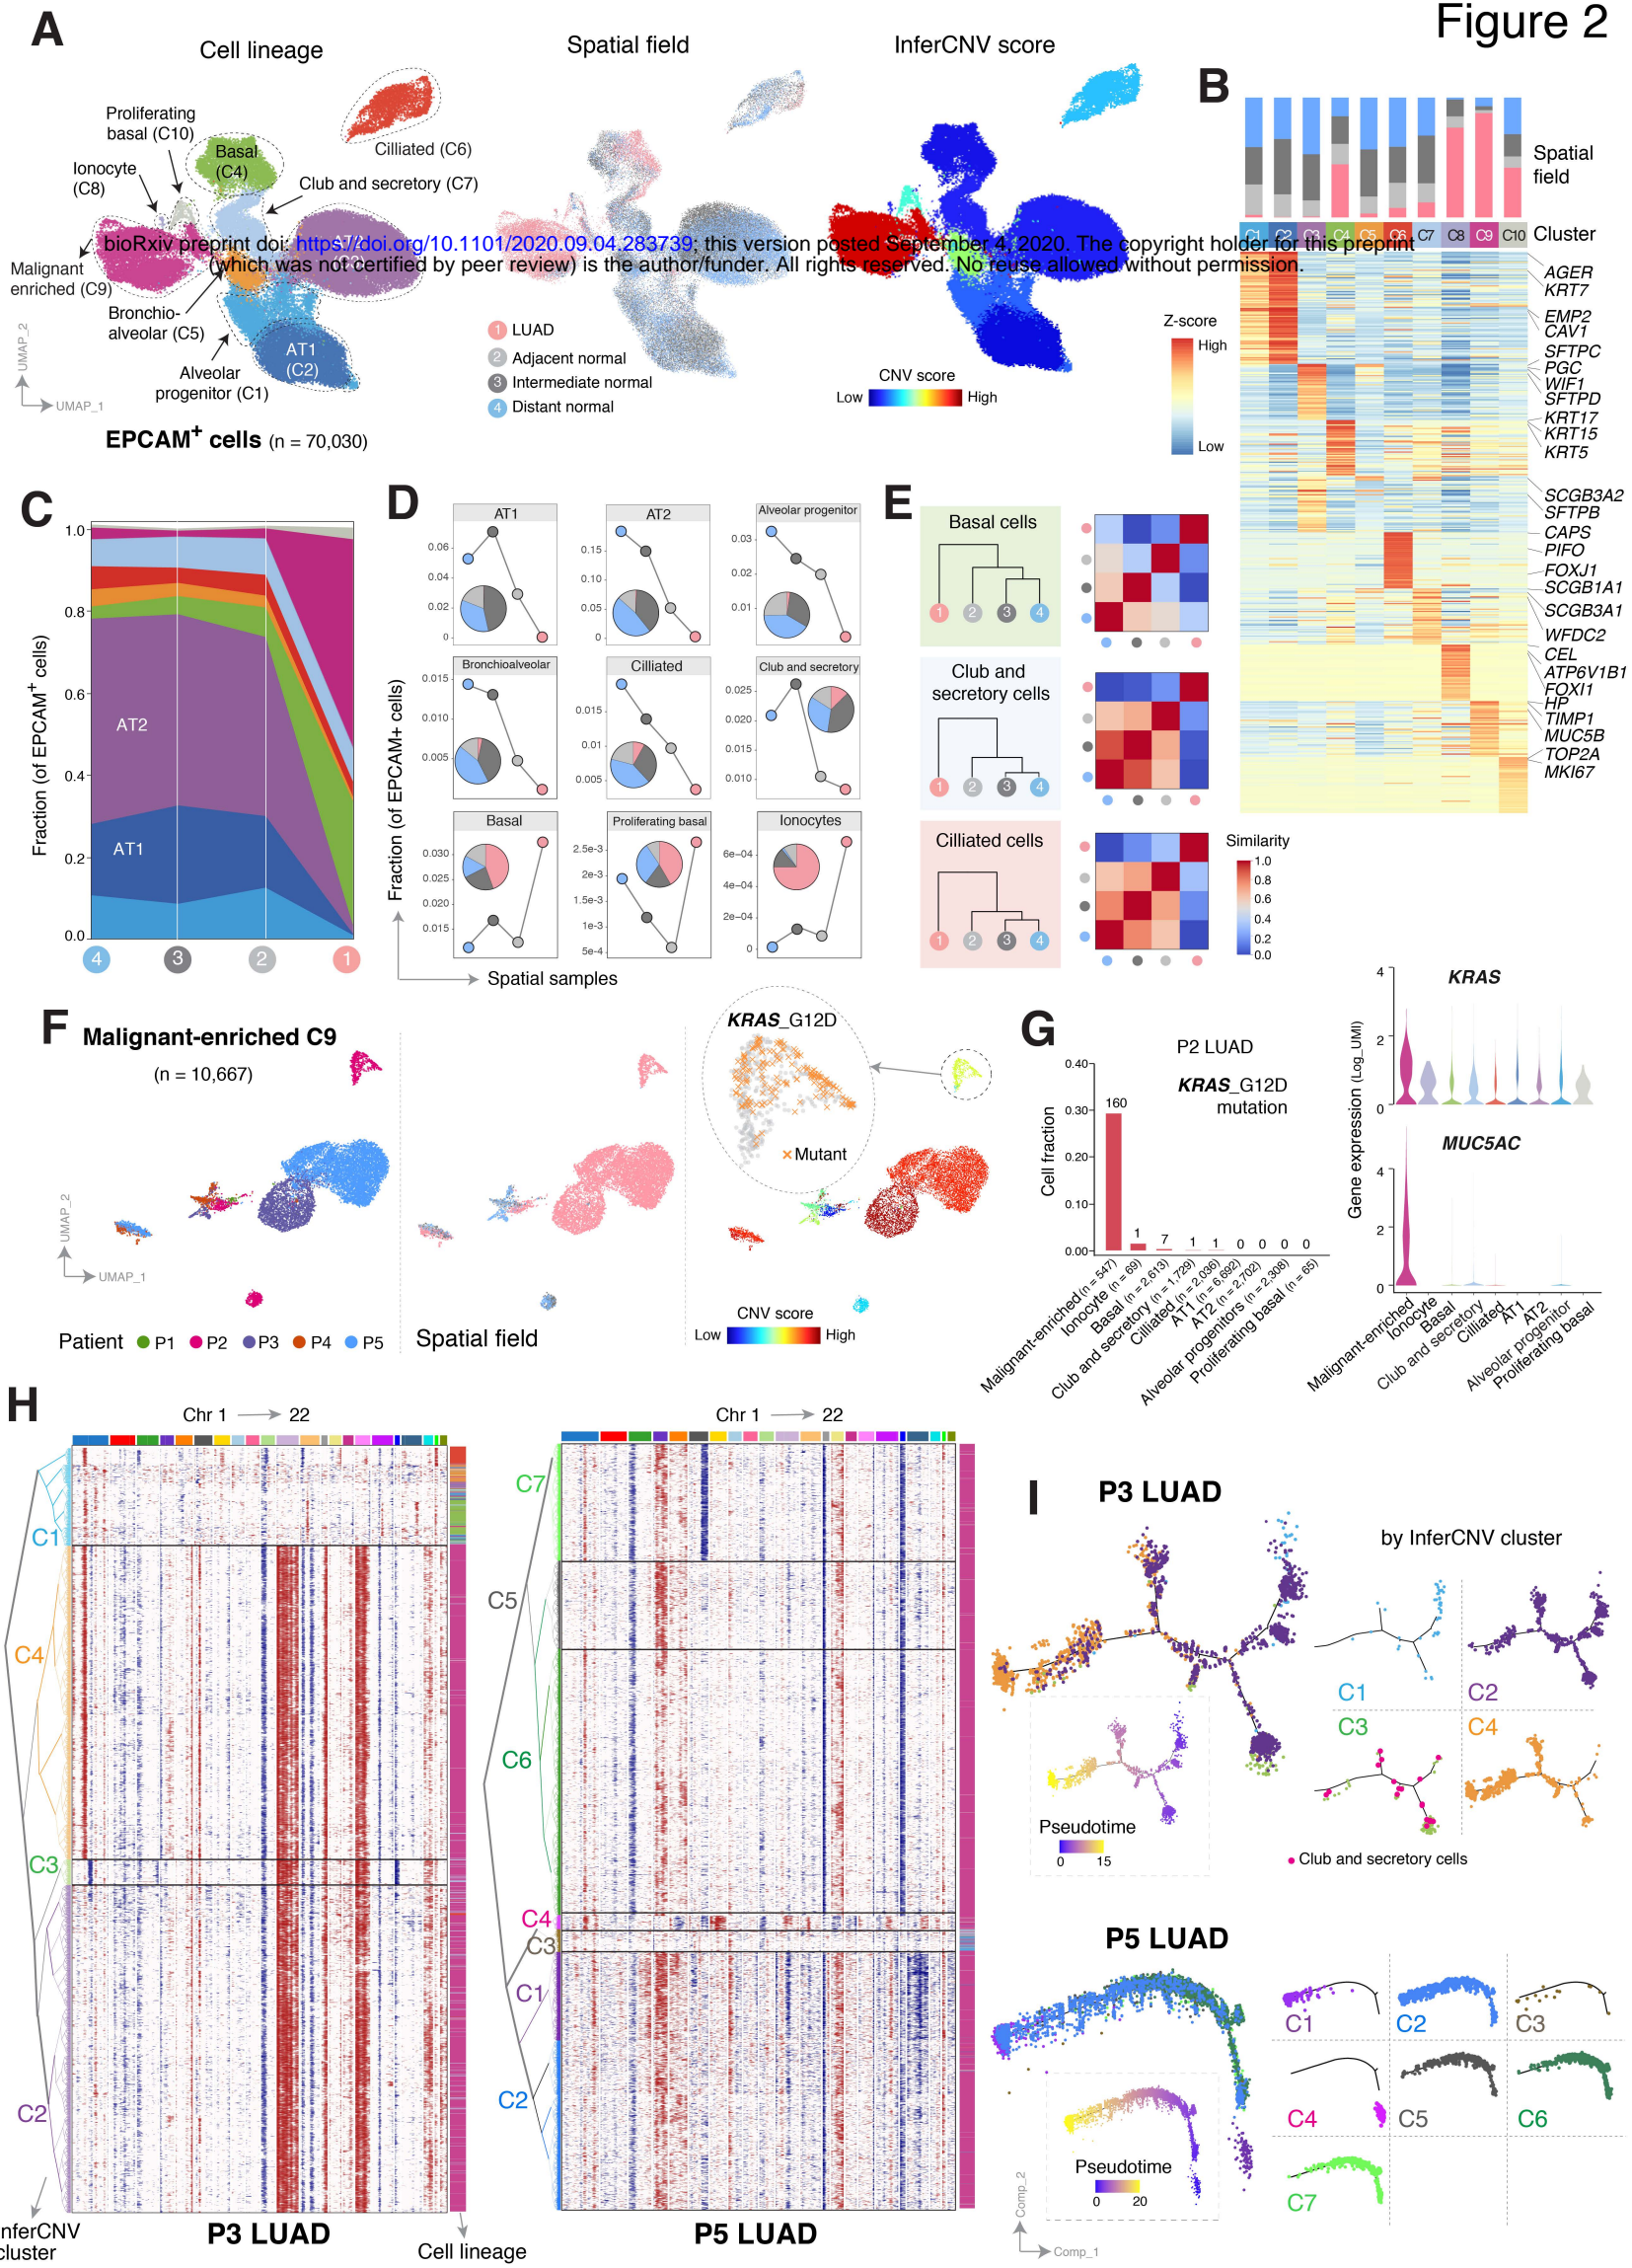

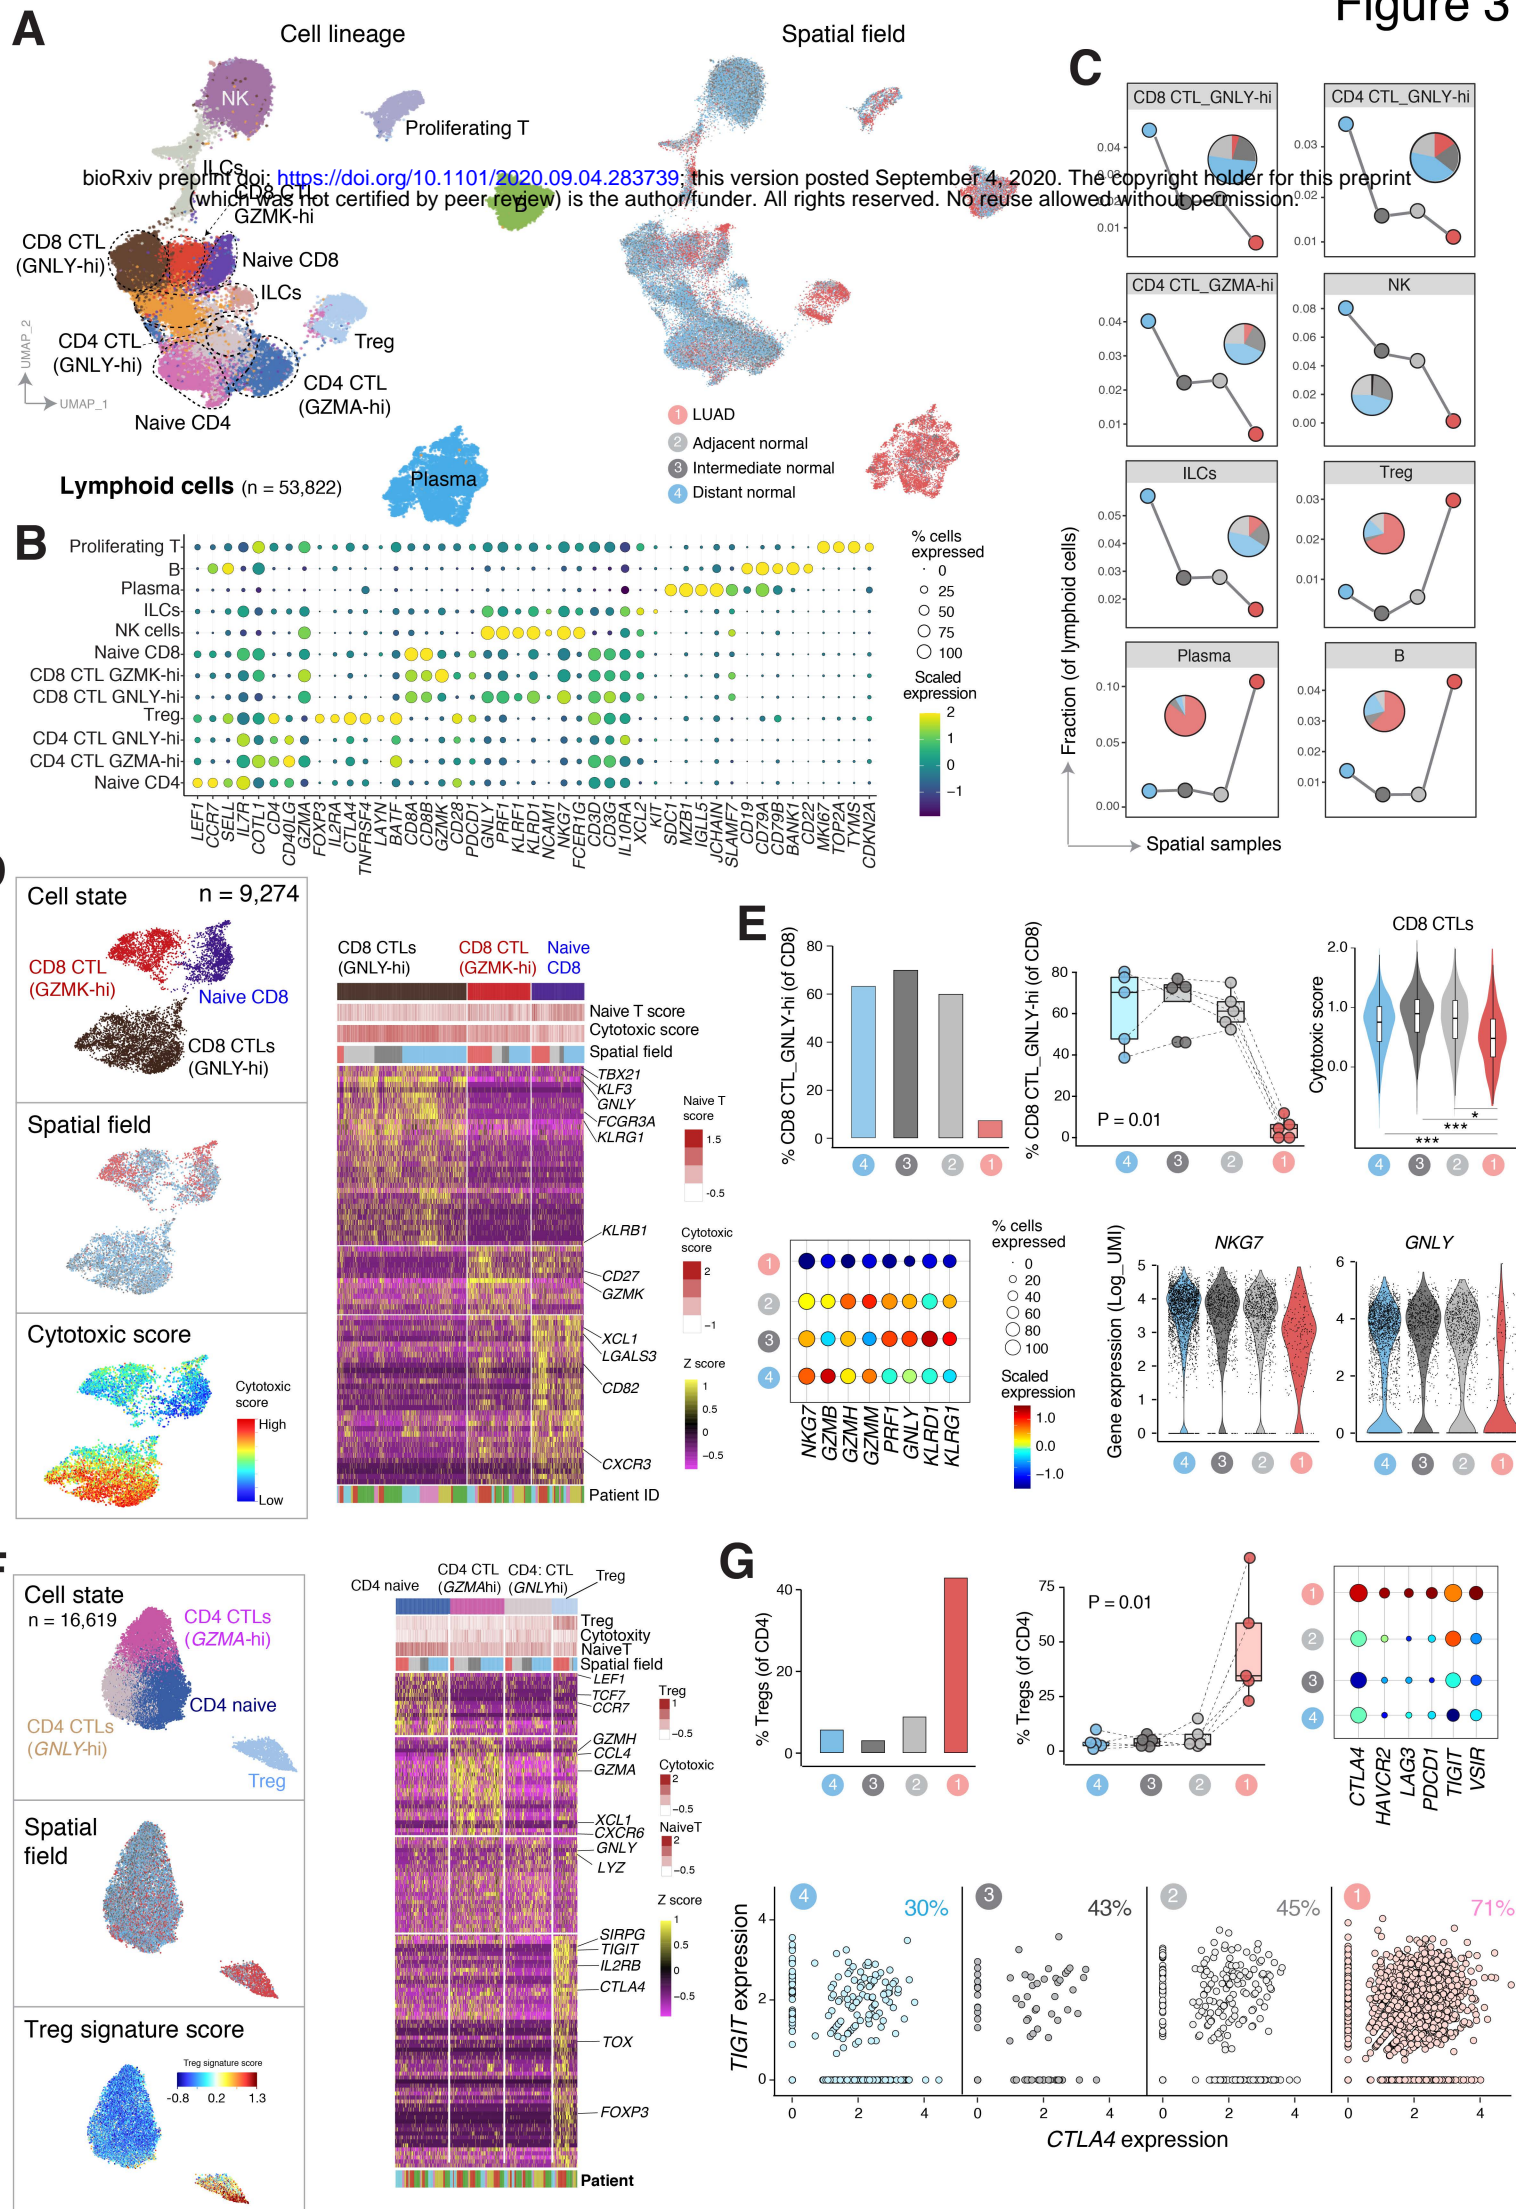

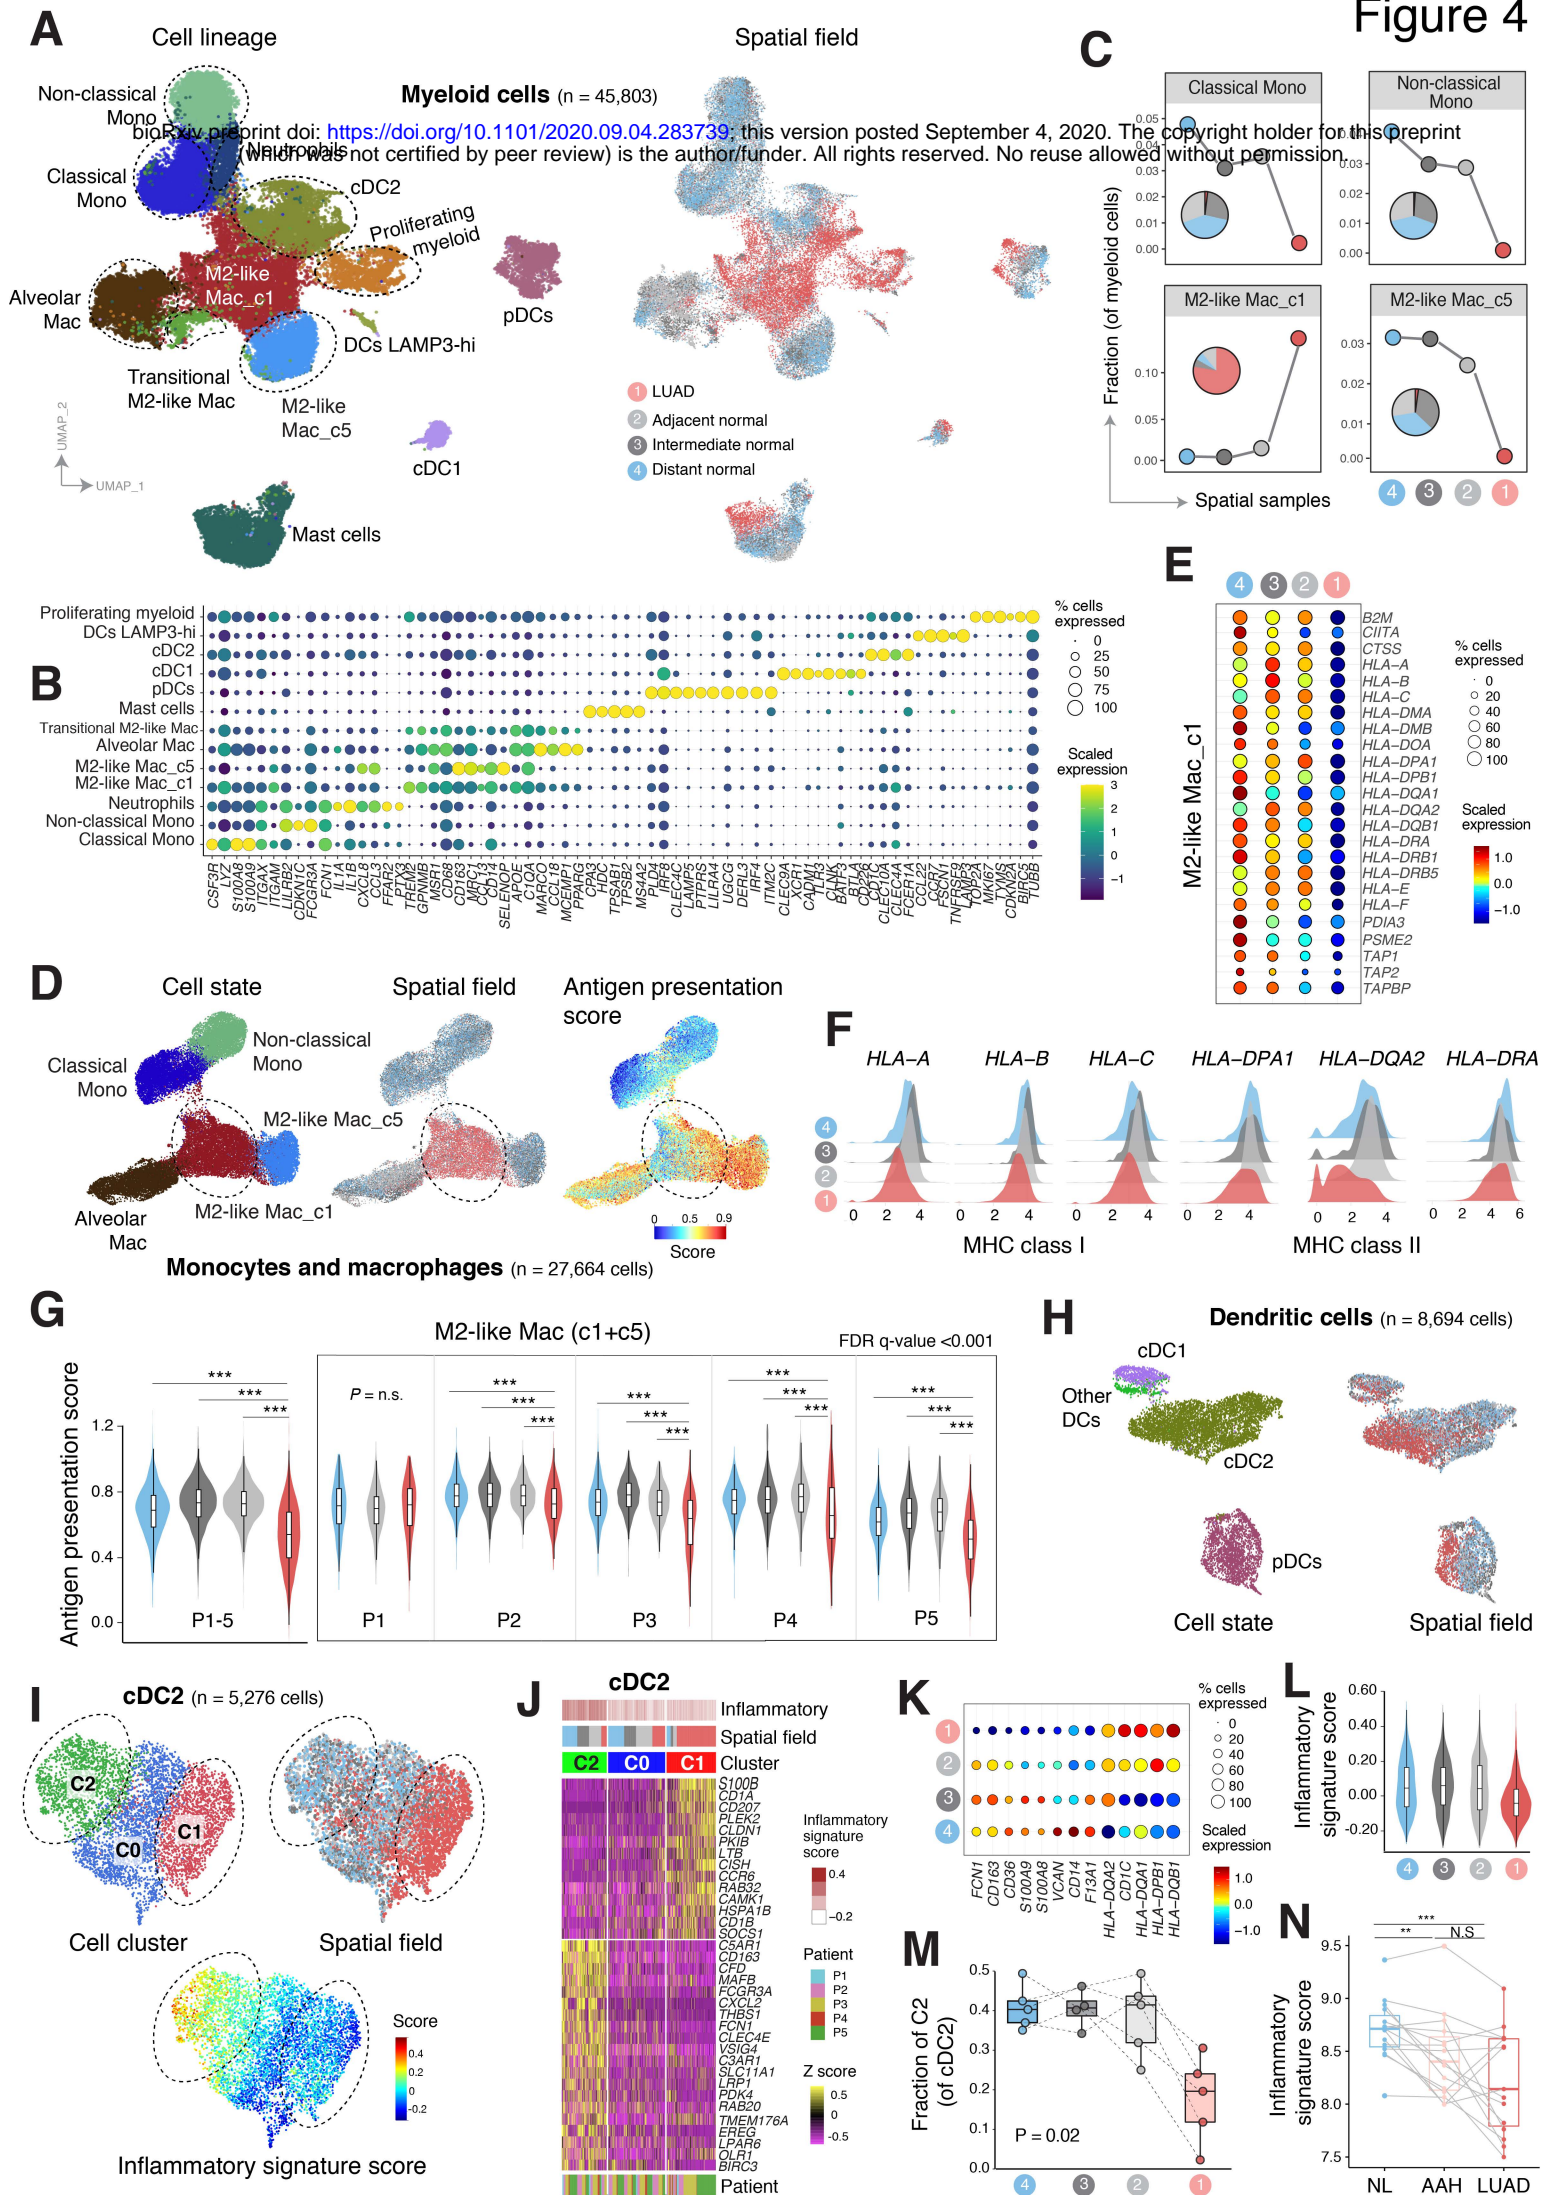



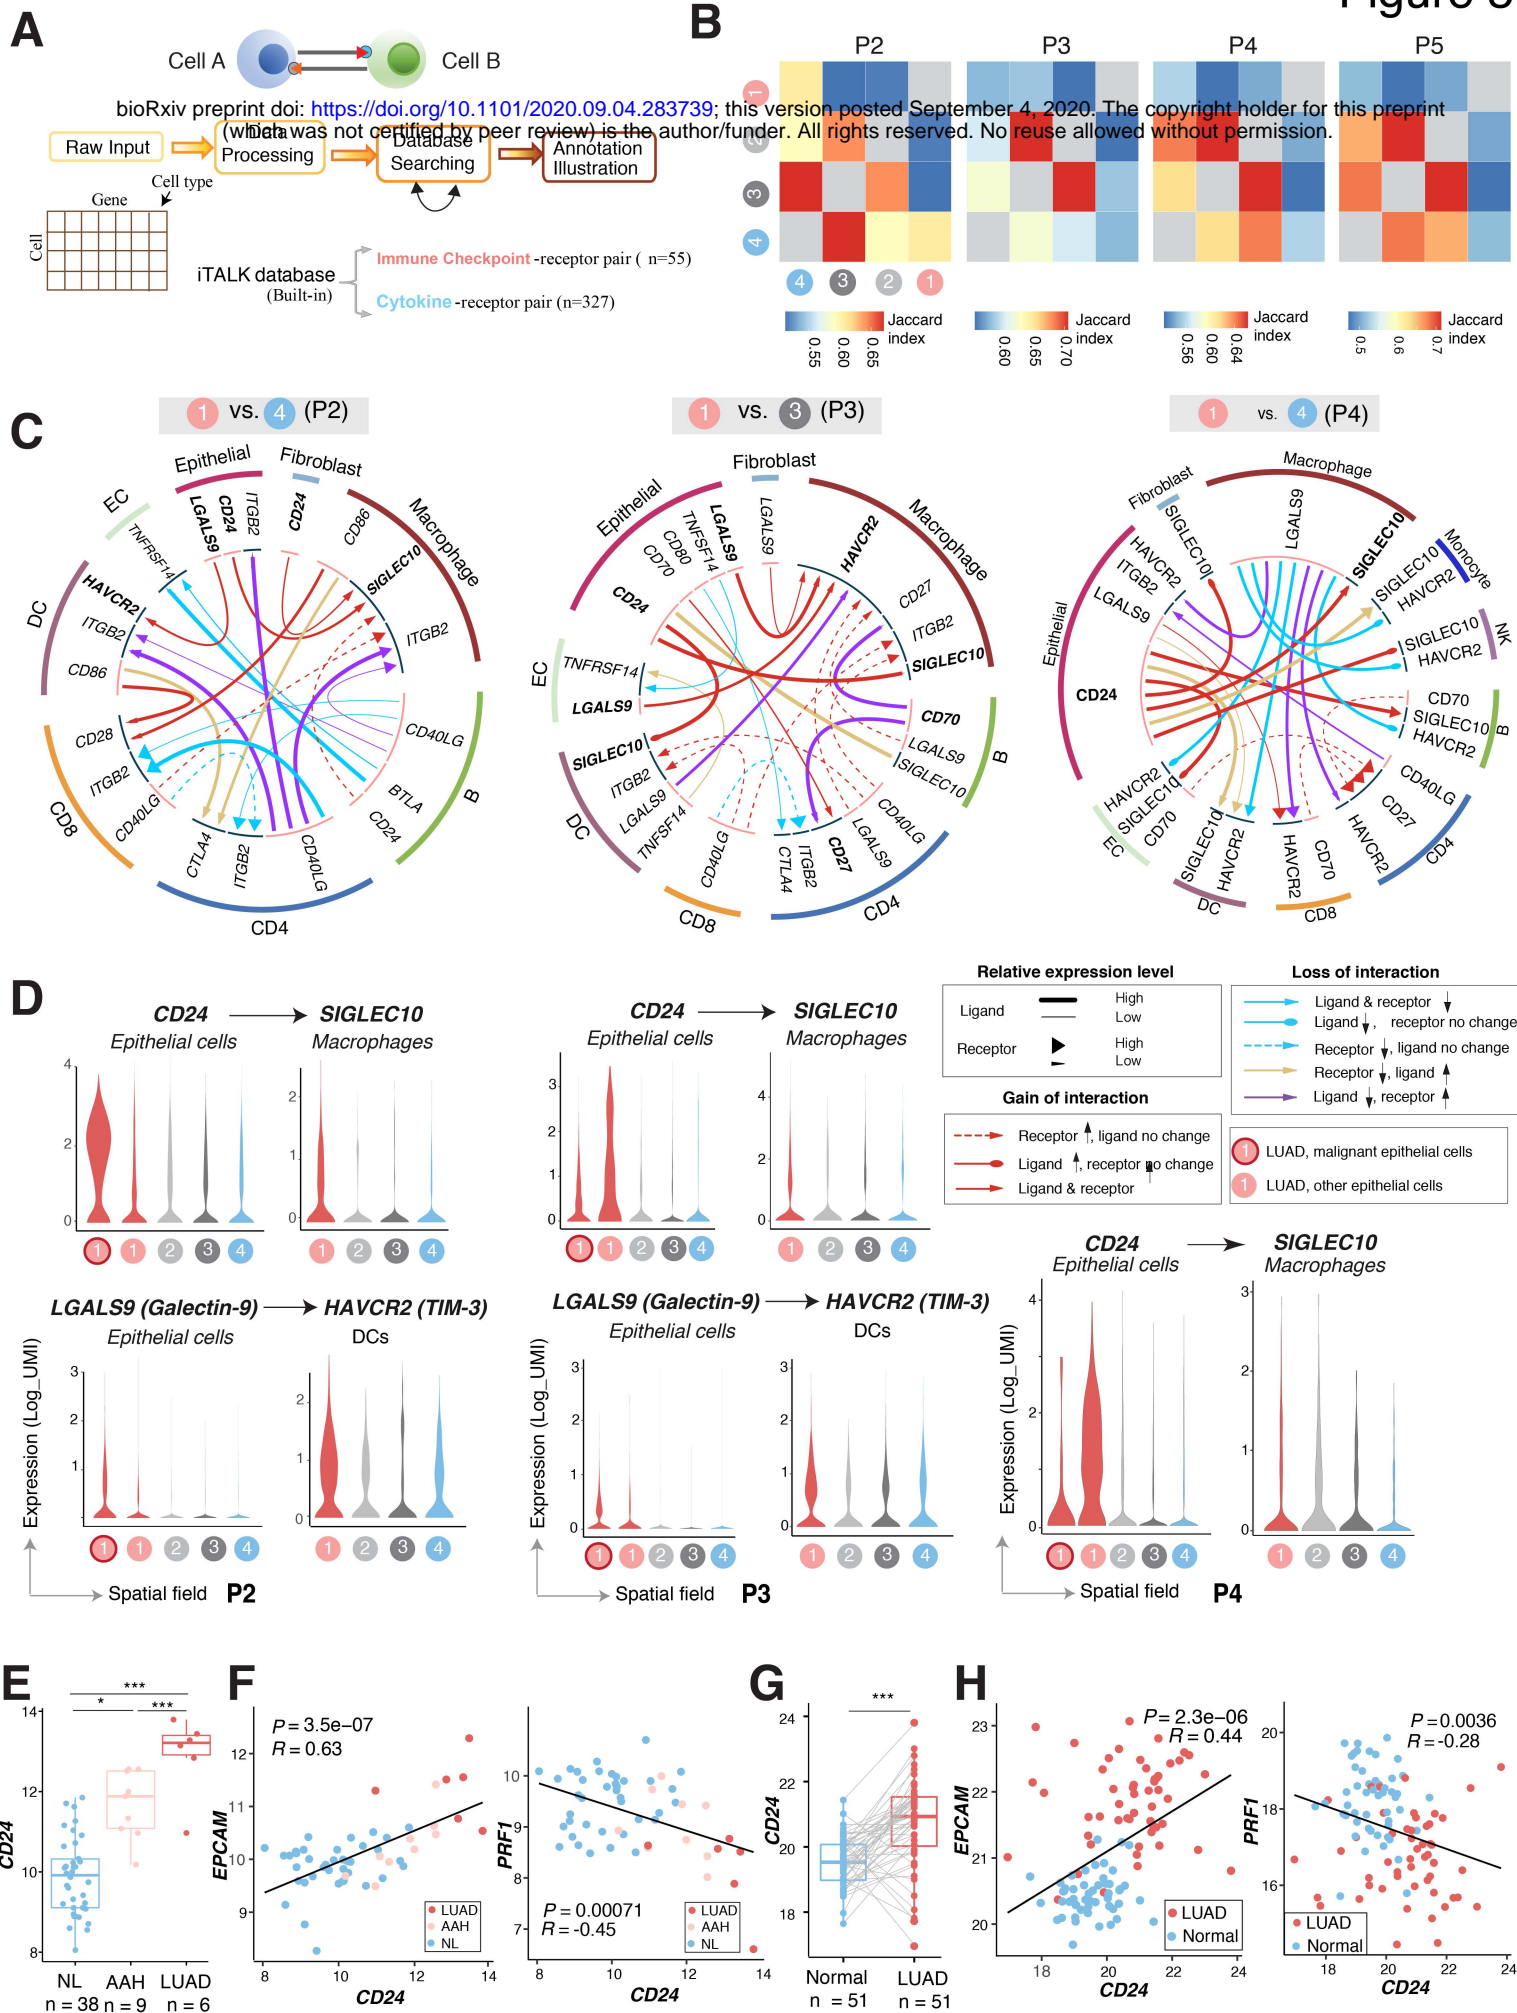

# Supplementary figure S1

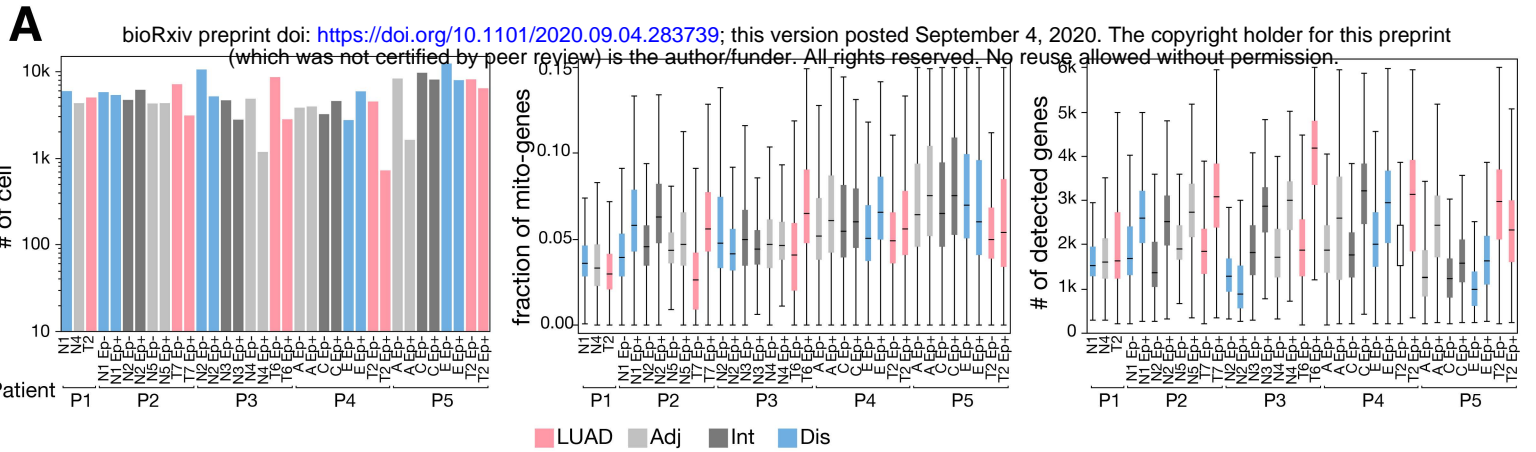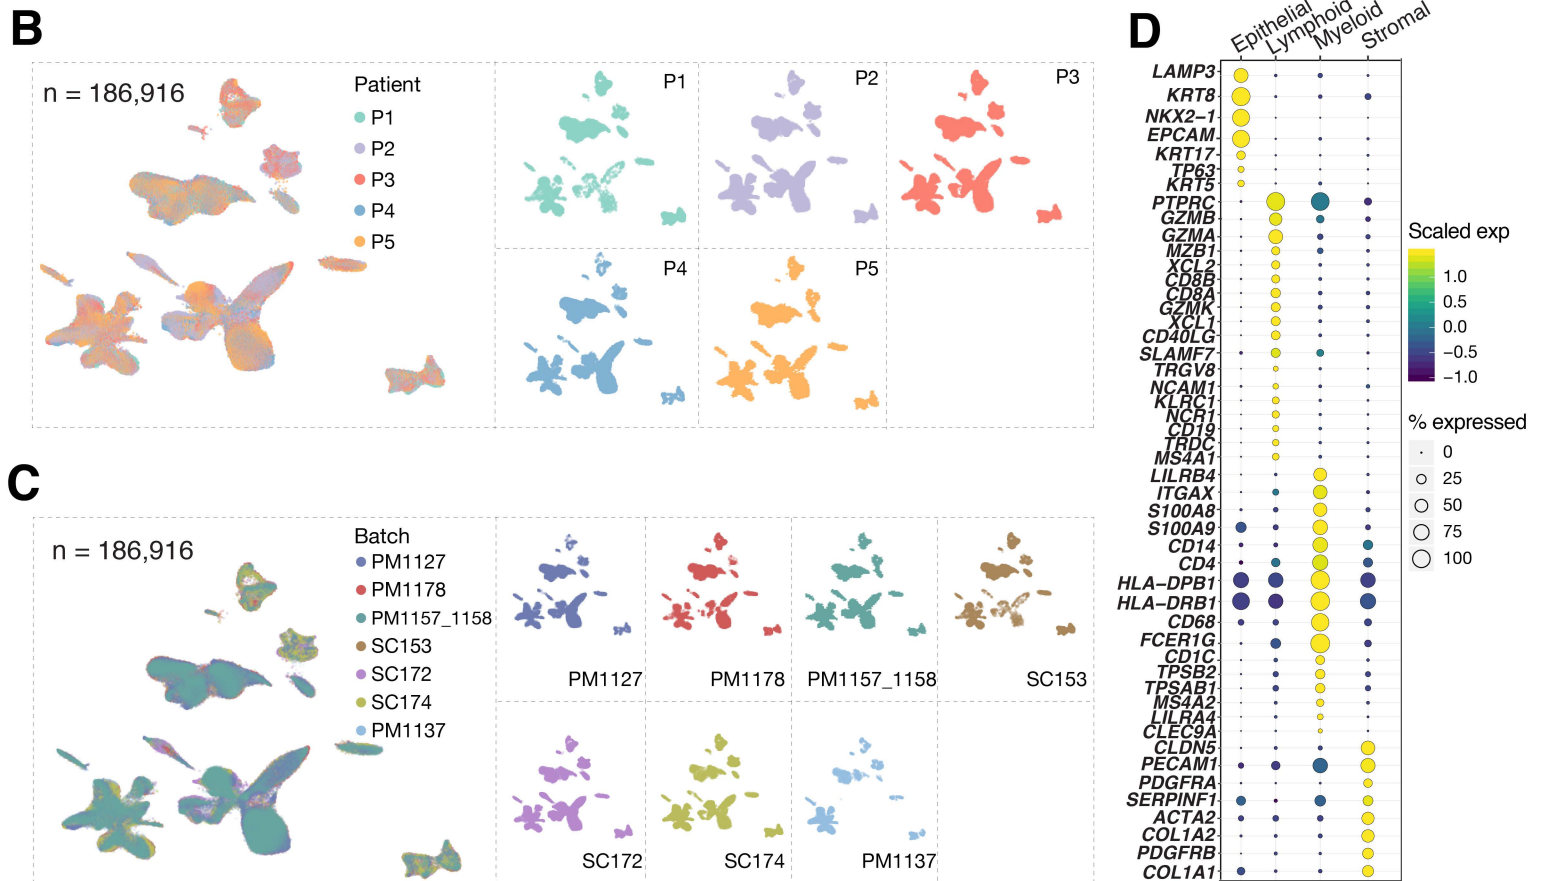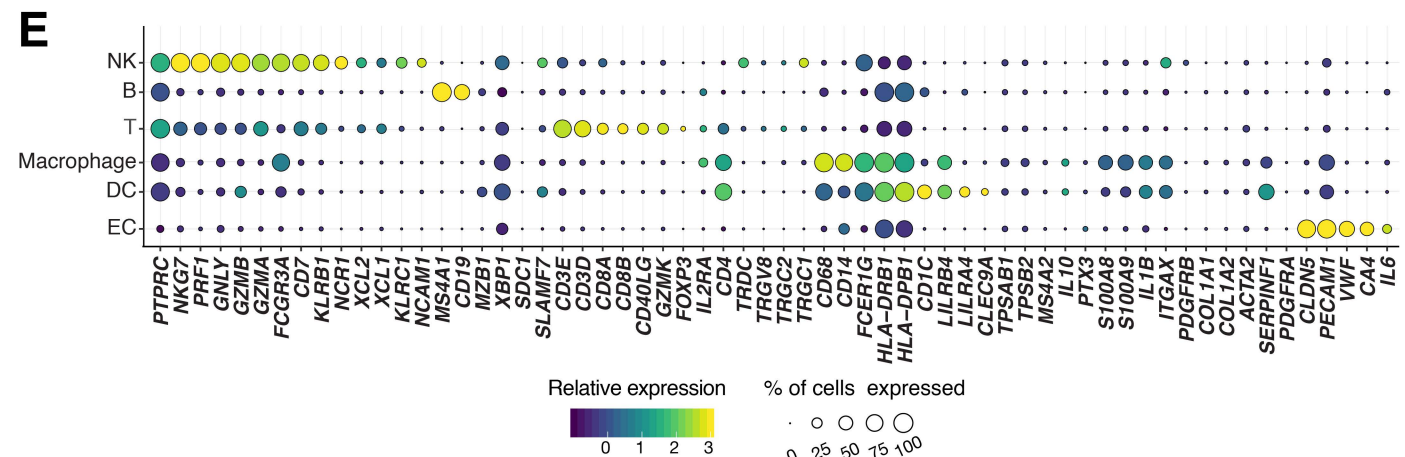

# Supplementary figure S2

**A**

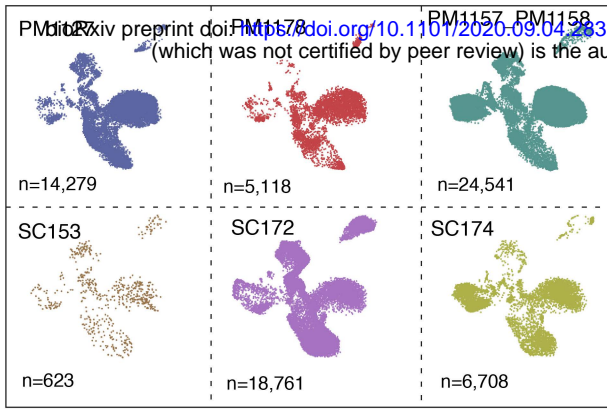

**B**

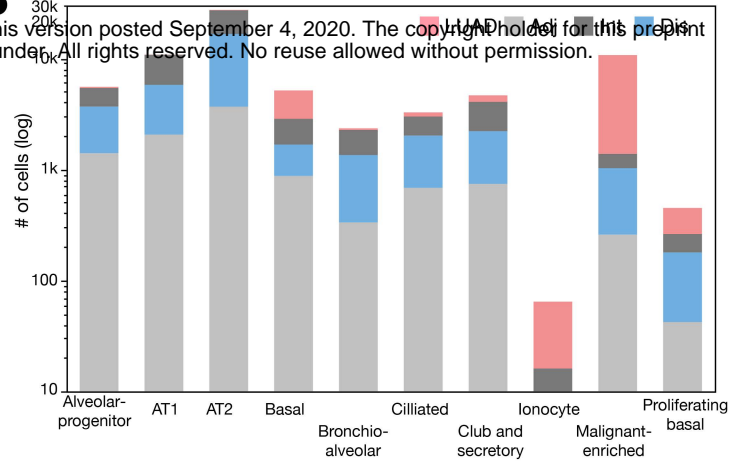

**C**

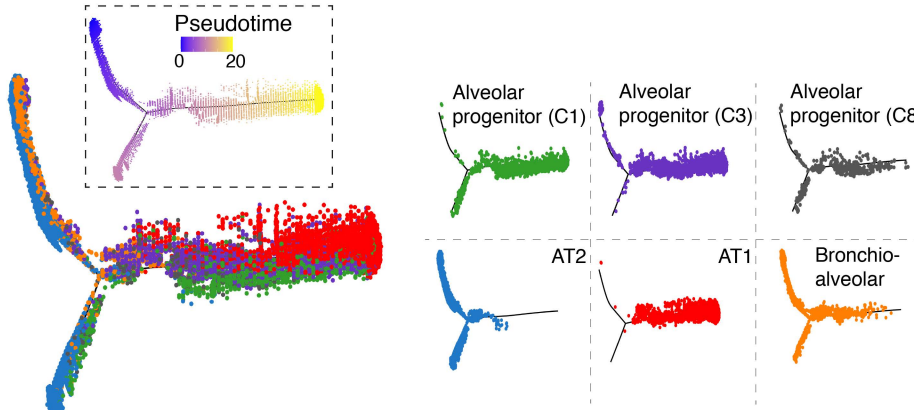

**D**

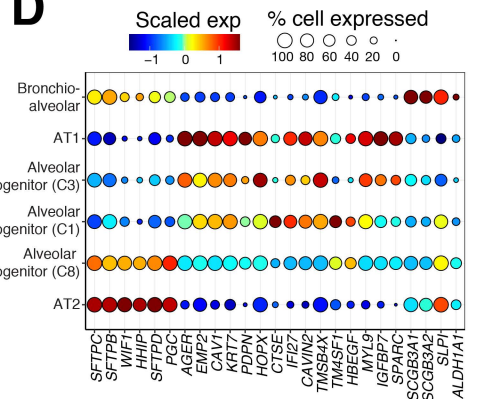

**E**

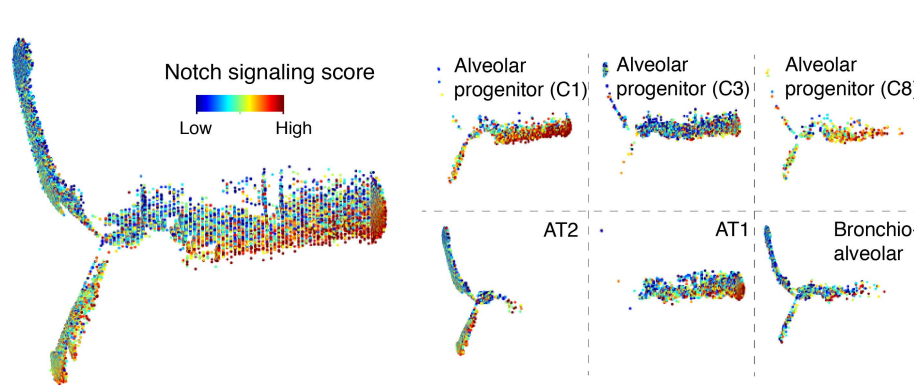

**F**

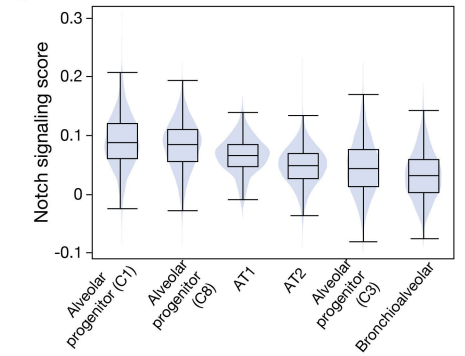

**G**

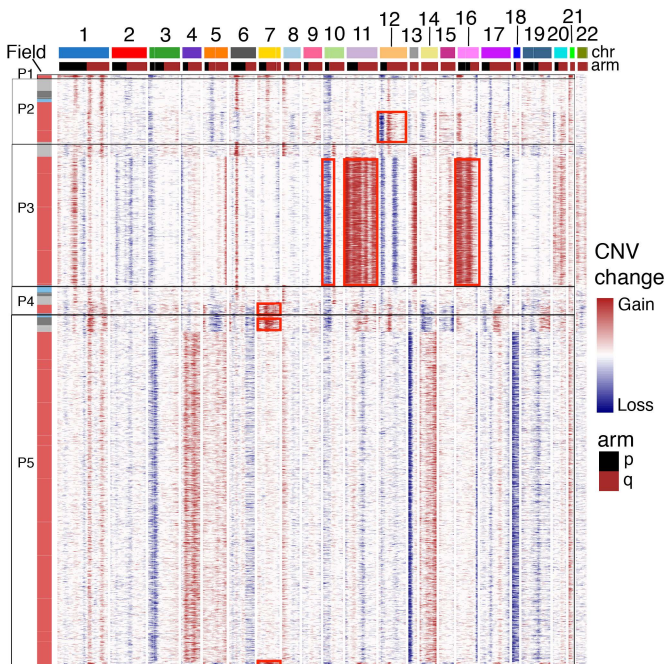

**H**

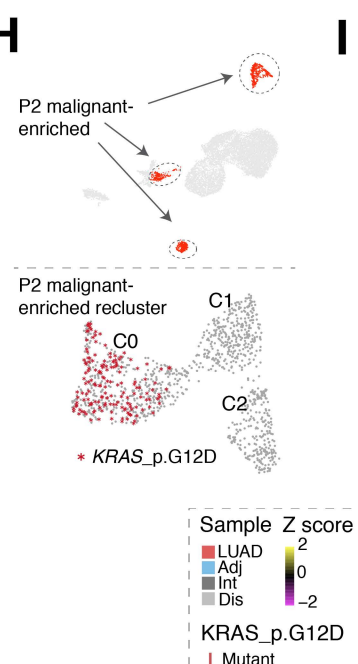

**I**

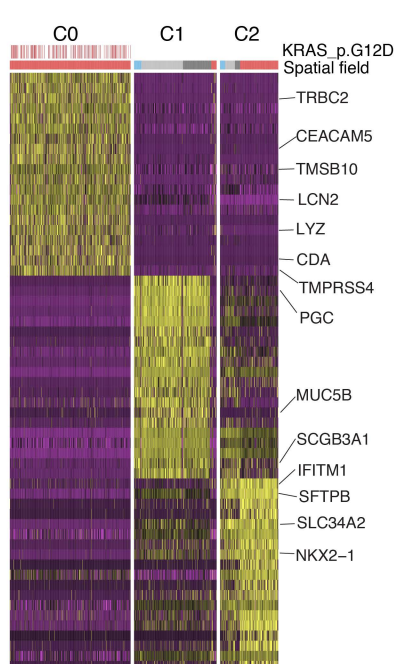

# Supplementary figure S3

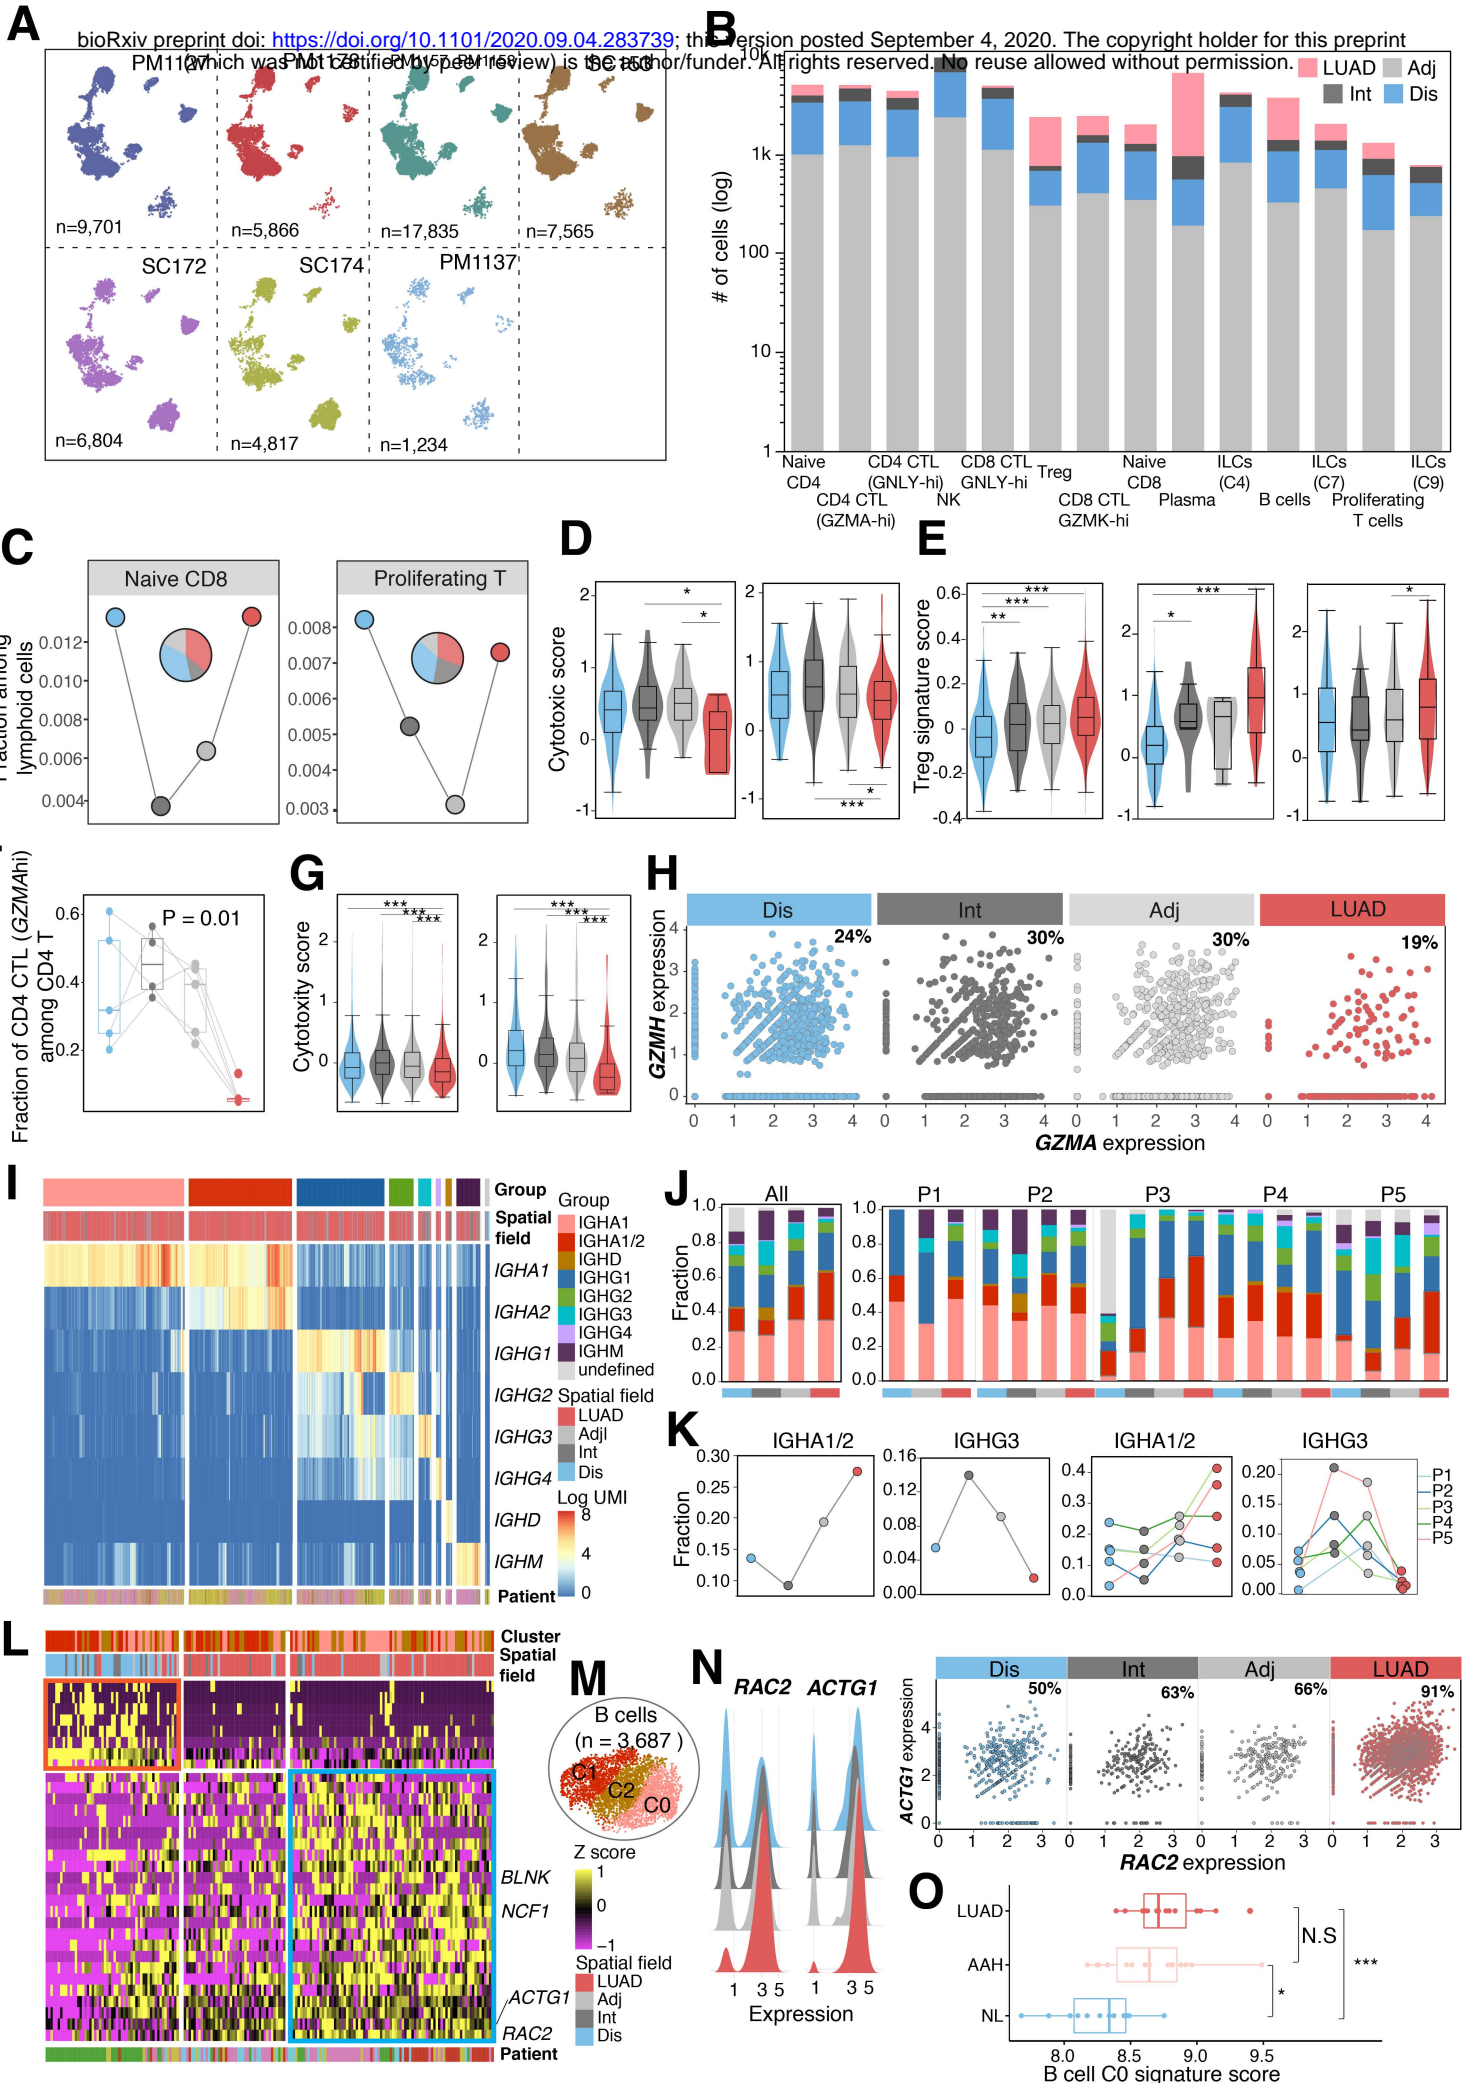

# Supplementary figure S4

bioRxiv preprint doi: <https://doi.org/10.1101/2020.09.04.283739>; this version posted September 4, 2020. The copyright holder for this preprint (which was not certified by peer review) is the author/funder. All rights reserved. No reuse allowed without permission.

## A

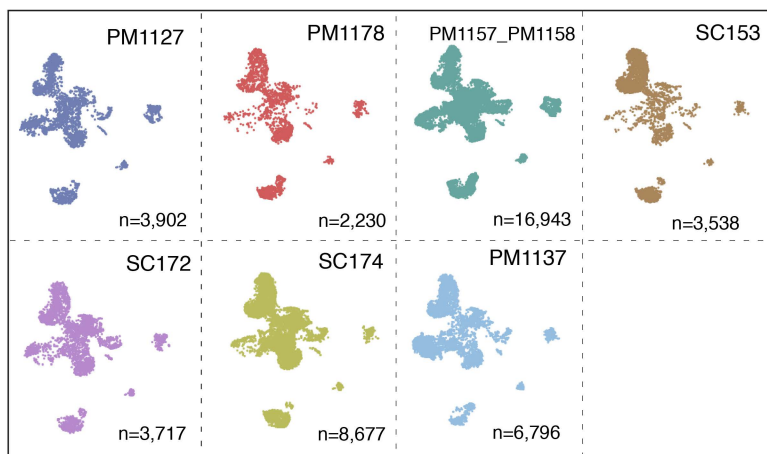

## B

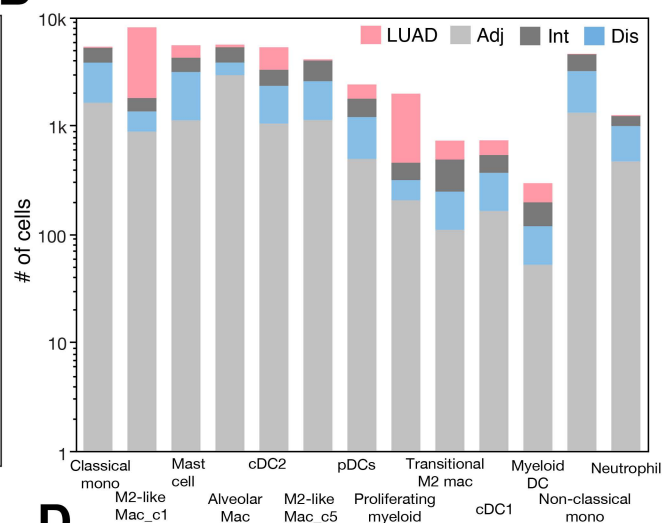

## C

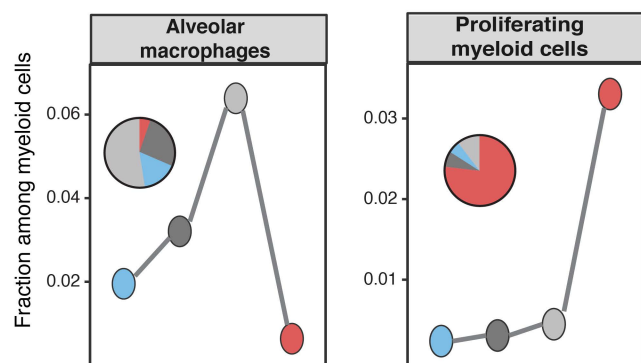

## D

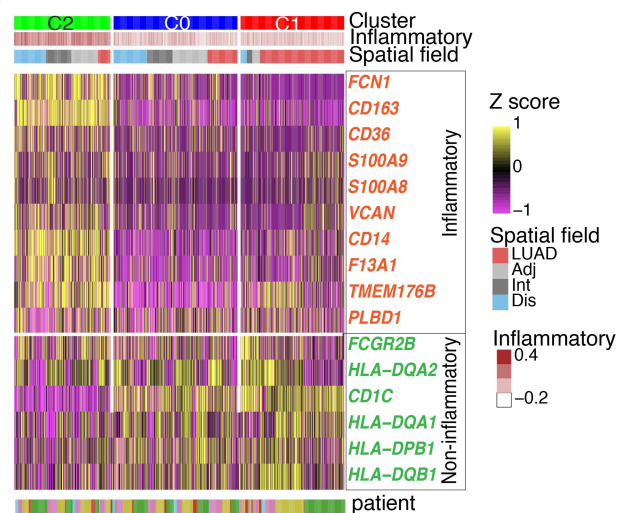

## F

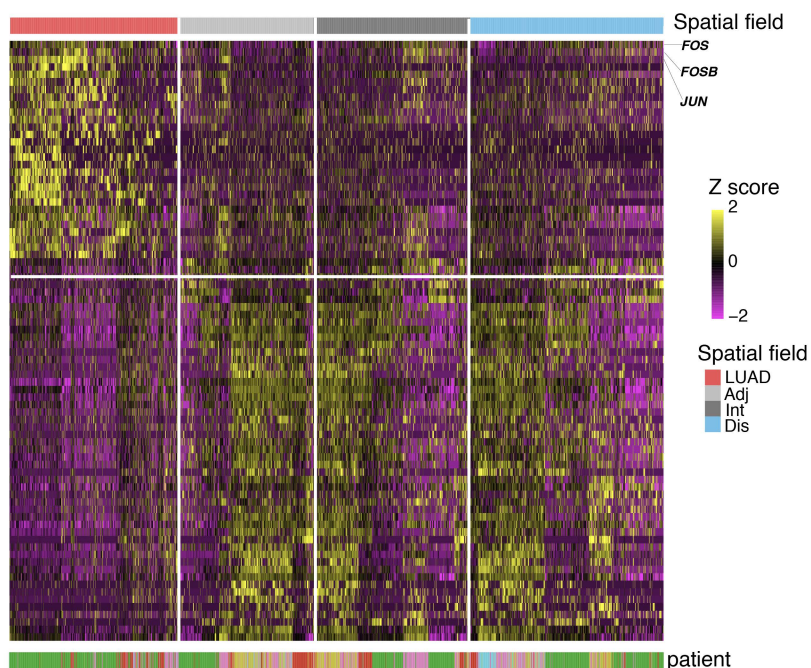

## E

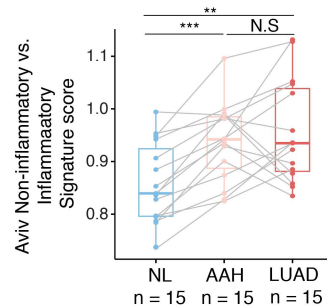

## G

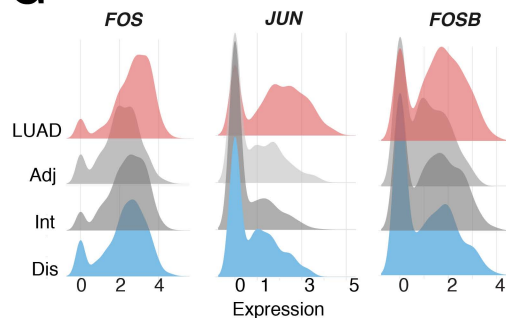

# Supplementary figure S5

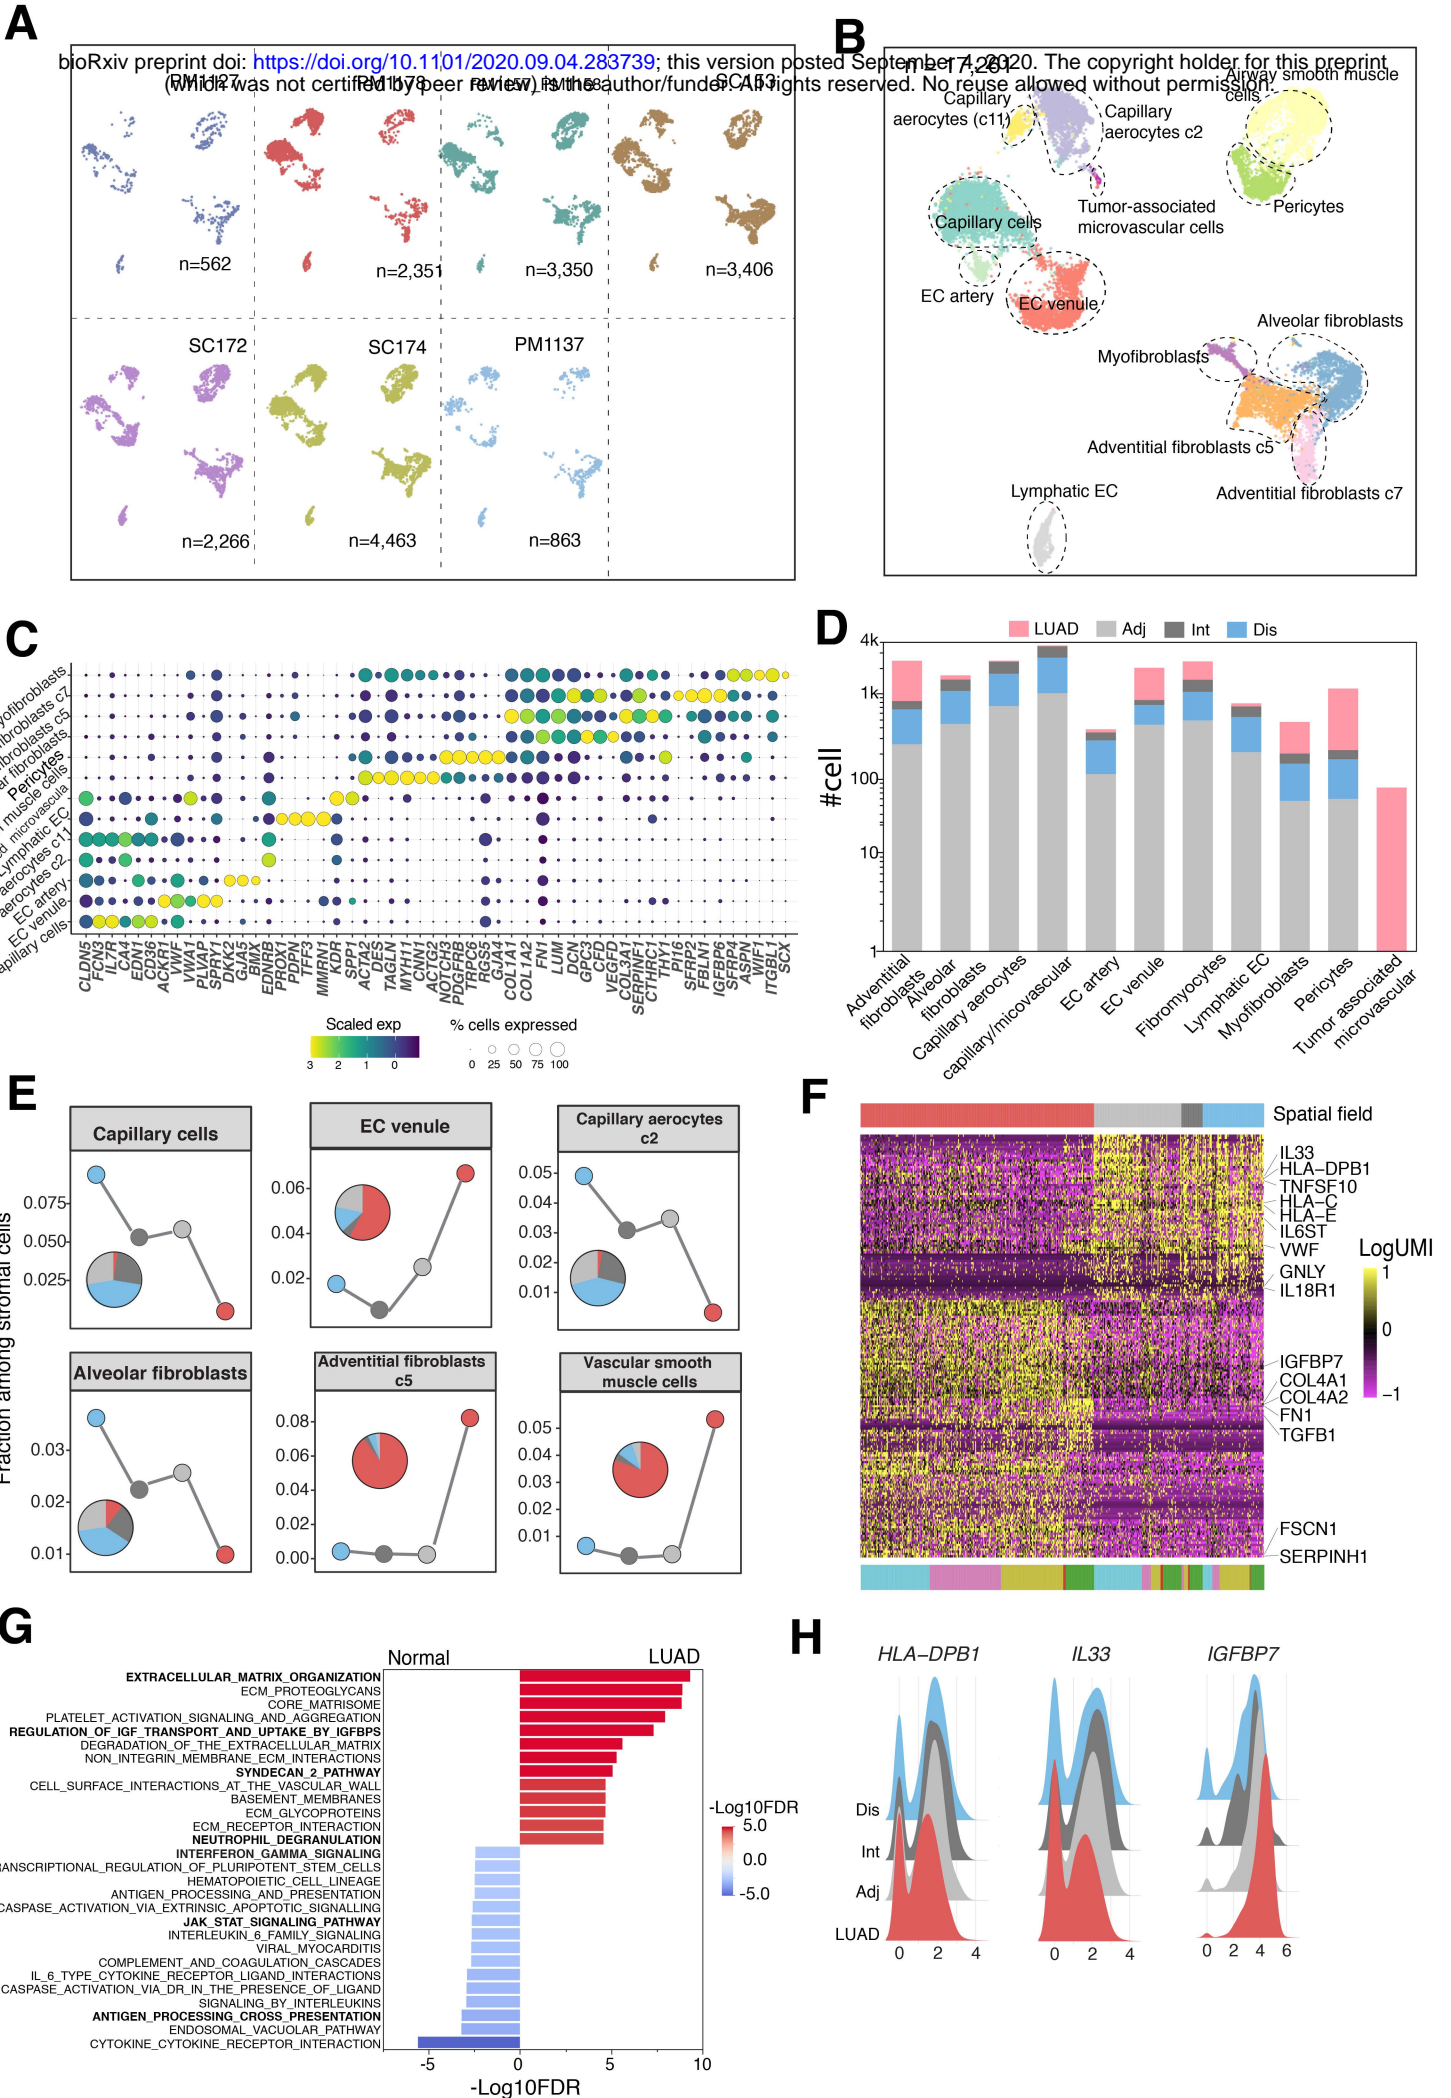

# Supplementary figure S6

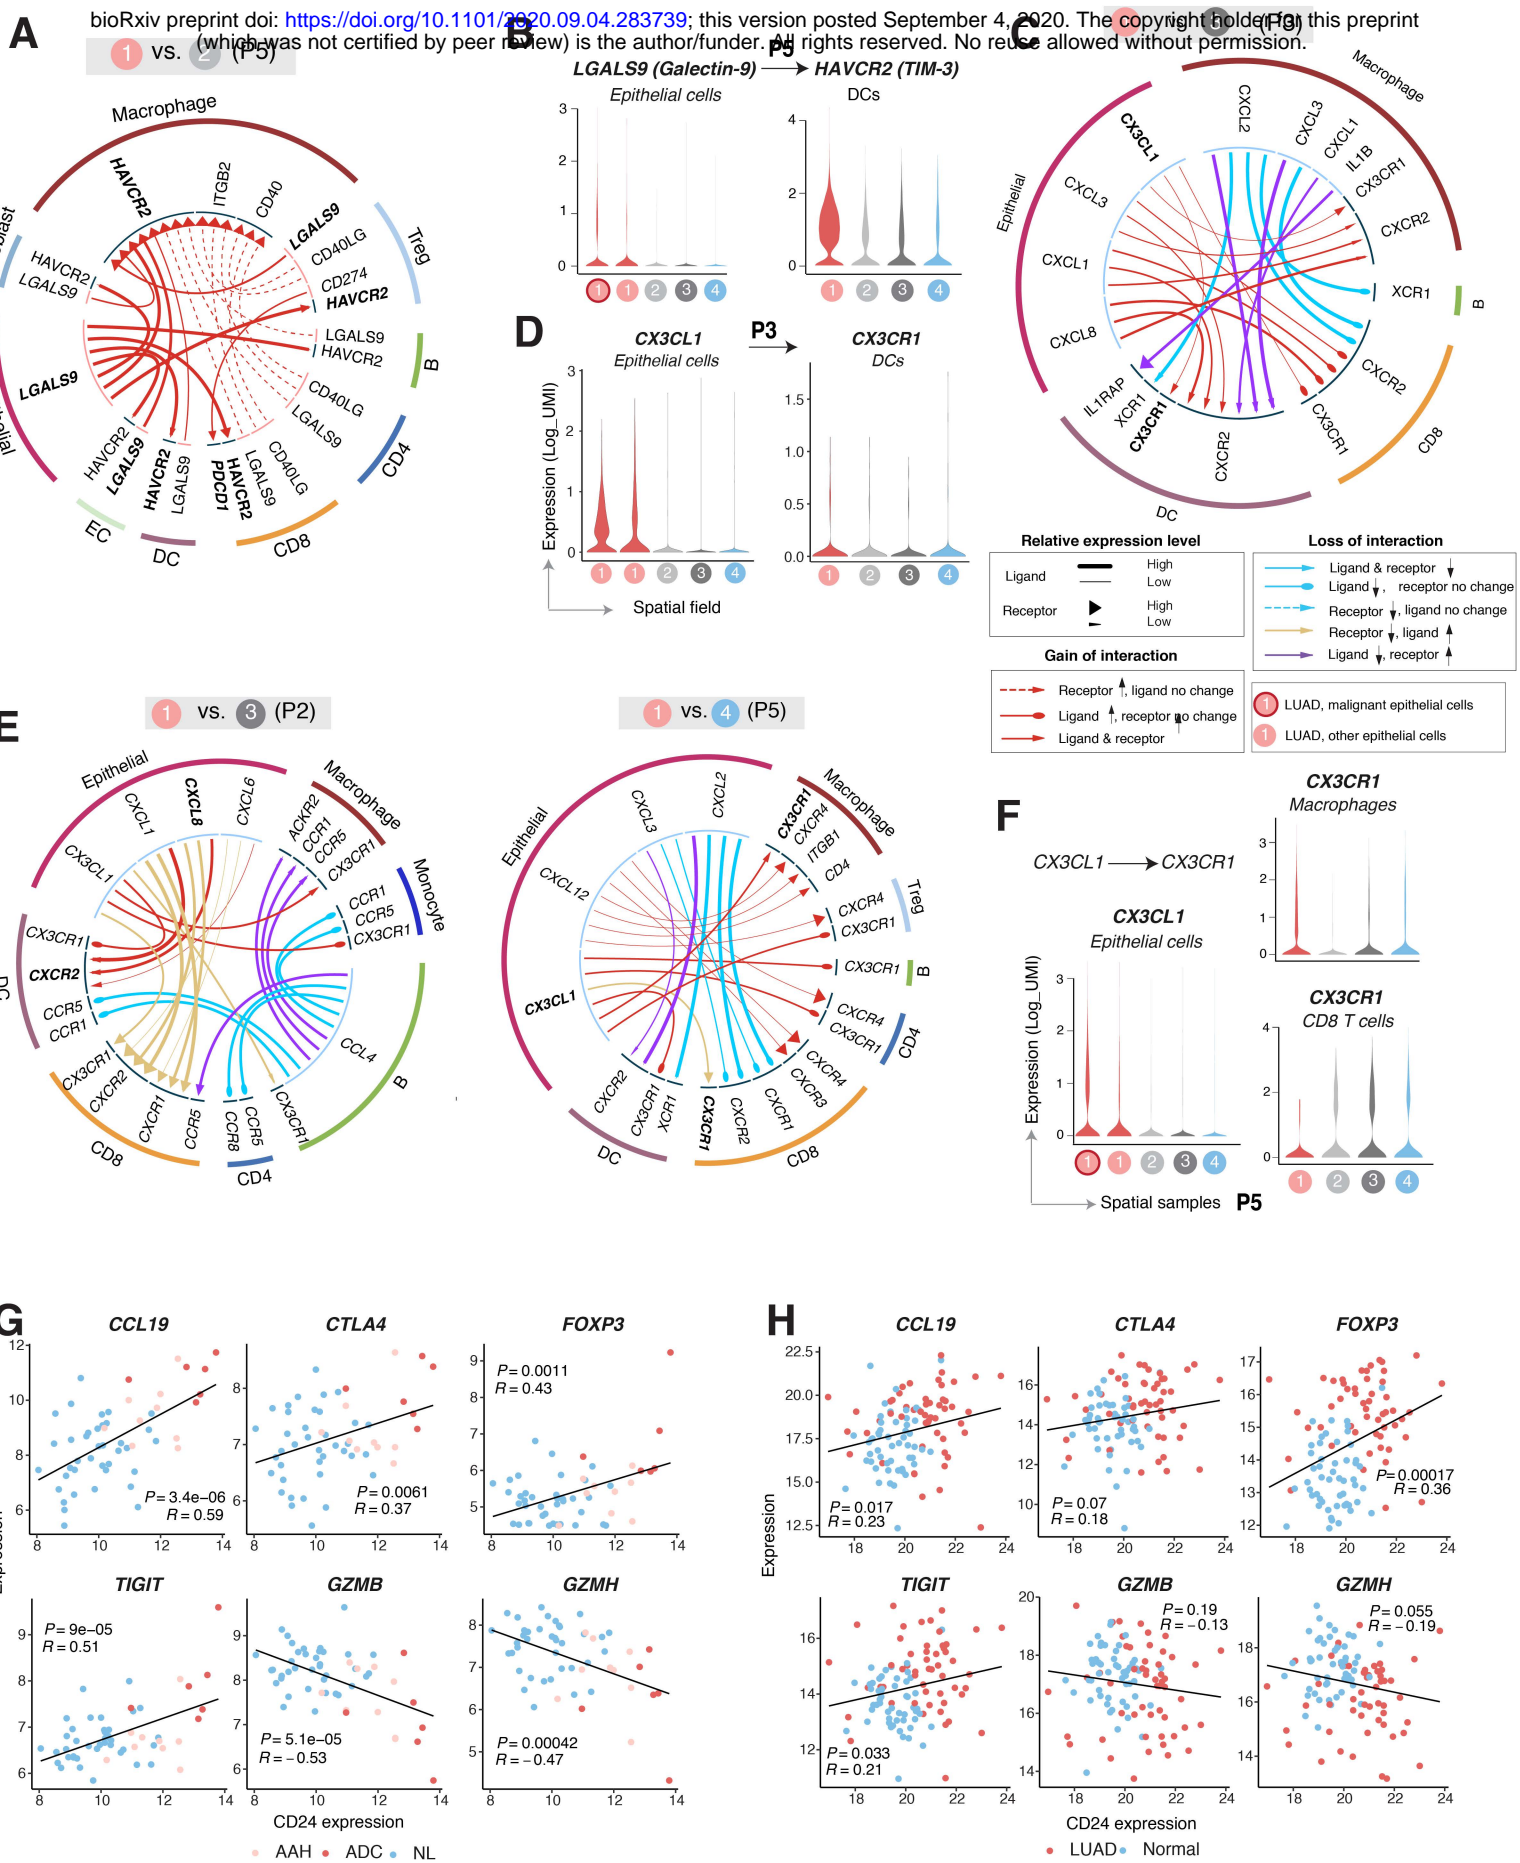

Source: https://biorxiv.org/content/10.1101/2020.09.04.283739v1.full.pdf
